# Supplementary material for: Searching for the Optimal Sampling Solution: Variation in Invertebrate Communities, Sample Condition and DNA Quality
Source: PubMed Central journal article supplement (PMC4740435; doi:10.1371/journal.pone.0148247), 2016-02-03
Supplement: pone.0148247.s003.pdf [file pone.0148247.s003.pdf]

### Supplementary S3: Results of preliminary study (older samples from 2008-2011)

From the preliminary study, we recovered correct barcoding sequences from 37/138 Salting-Out [1] and 26/137 Phenol-Chloroform extracted samples. Identification success was dependent on both the species and extraction method (GLM quasibinomial:  $F_{6,239}=2.69$ ,  $P=0.015$ ) and also between species and the sampling solution (GLM quasibinomial:  $F_{18,245}=3.60$ ,  $P<0.001$ ). One species (*Anobium costatum*) produced no positive identifications from the sequencing data, whereas another (*Taphrorychus bicolor*) produced 29/40 correct identifications, with the success in this species dependent on the sampling solution. In general, using Ethanol as the sampling solution and extracted samples using the Salting-Out method recovered greater DNA yield and produced more positive sequence identifications (Fig A, Table A). Yield was measured on a Nanodrop 100 in the preliminary study, as opposed to a Quantus Fluorometer used in the main study.

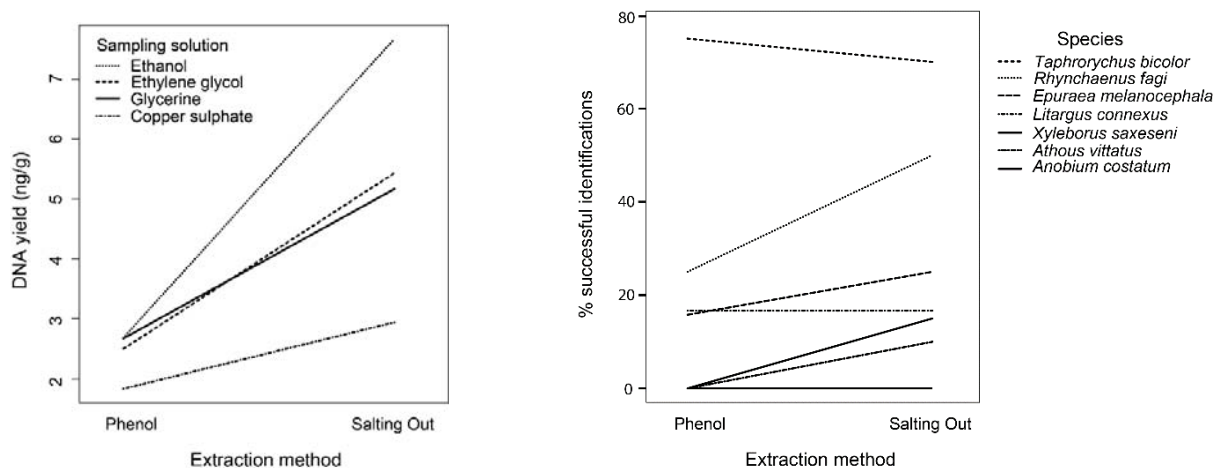

**Figure A:** Mean DNA yield (ng/g) across the different sampling solutions and extraction methods, and percentage of successfully identified individuals across species and extraction method.

**Table A:** Summary of data from the preliminary study comparing DNA and barcoding success from seven species, using two extraction methods from four sampling solutions.

| Species                      | Solution        | Extraction method | Mean DNA yield (ng/g) | ID success | No. samples |
|------------------------------|-----------------|-------------------|-----------------------|------------|-------------|
| <i>Anobium costatum</i>      | Copper sulphate | Salting Out       | 7.51                  | 0          | 5           |
| <i>Anobium costatum</i>      | Copper sulphate | Phenol            | 2.51                  | 0          | 5           |
| <i>Anobium costatum</i>      | Ethanol         | Salting Out       | 7.04                  | 0          | 5           |
| <i>Anobium costatum</i>      | Ethanol         | Phenol            | 2.26                  | 0          | 5           |
| <i>Anobium costatum</i>      | Ethylene glycol | Salting Out       | 5.38                  | 0          | 5           |
| <i>Anobium costatum</i>      | Ethylene glycol | Phenol            | 3.39                  | 0          | 5           |
| <i>Anobium costatum</i>      | Glycerine       | Salting Out       | 1.65                  | 0          | 5           |
| <i>Anobium costatum</i>      | Glycerine       | Phenol            | 1.58                  | 0          | 5           |
| <i>Athous vittatus</i>       | Copper sulphate | Salting Out       | 0.41                  | 0          | 5           |
| <i>Athous vittatus</i>       | Copper sulphate | Phenol            | 1.70                  | 0          | 5           |
| <i>Athous vittatus</i>       | Ethanol         | Salting Out       | 1.60                  | 2          | 5           |
| <i>Athous vittatus</i>       | Ethanol         | Phenol            | 0.35                  | 0          | 5           |
| <i>Athous vittatus</i>       | Ethylene glycol | Salting Out       | 0.45                  | 0          | 5           |
| <i>Athous vittatus</i>       | Ethylene glycol | Phenol            | 1.23                  | 0          | 5           |
| <i>Athous vittatus</i>       | Glycerine       | Salting Out       | 3.13                  | 0          | 5           |
| <i>Athous vittatus</i>       | Glycerine       | Phenol            | 0.93                  | 0          | 5           |
| <i>Eपुरaea melanocephala</i> | Copper sulphate | Salting Out       | 2.62                  | 0          | 5           |
| <i>Eपुरaea melanocephala</i> | Copper sulphate | Phenol            | 0.58                  | 0          | 5           |
| <i>Eपुरaea melanocephala</i> | Ethanol         | Salting Out       | 10.49                 | 3          | 5           |
| <i>Eपुरaea melanocephala</i> | Ethanol         | Phenol            | 2.72                  | 2          | 5           |
| <i>Eपुरaea melanocephala</i> | Ethylene glycol | Salting Out       | 2.74                  | 2          | 5           |
| <i>Eपुरaea melanocephala</i> | Ethylene glycol | Phenol            | 1.69                  | 1          | 5           |
| <i>Eपुरaea melanocephala</i> | Glycerine       | Salting Out       | 3.56                  | 0          | 5           |
| <i>Eपुरaea melanocephala</i> | Glycerine       | Phenol            | 1.06                  | 0          | 5           |
| <i>Rhynchaenus fagi</i>      | Copper sulphate | Salting Out       | 4.63                  | 2          | 5           |
| <i>Rhynchaenus fagi</i>      | Copper sulphate | Phenol            | 1.69                  | 1          | 5           |
| <i>Rhynchaenus fagi</i>      | Ethanol         | Salting Out       | 2.40                  | 1          | 5           |
| <i>Rhynchaenus fagi</i>      | Ethanol         | Phenol            | 0.82                  | 1          | 5           |
| <i>Rhynchaenus fagi</i>      | Ethylene glycol | Salting Out       | 9.90                  | 3          | 5           |
| <i>Rhynchaenus fagi</i>      | Ethylene glycol | Phenol            | 4.17                  | 2          | 5           |
| <i>Rhynchaenus fagi</i>      | Glycerine       | Salting Out       | 6.95                  | 4          | 5           |
| <i>Rhynchaenus fagi</i>      | Glycerine       | Phenol            | 1.50                  | 1          | 5           |
| <i>Taphrorychus bicolor</i>  | Copper sulphate | Salting Out       | 0.57                  | 0          | 5           |
| <i>Taphrorychus bicolor</i>  | Copper sulphate | Phenol            | 2.68                  | 2          | 5           |
| <i>Taphrorychus bicolor</i>  | Ethanol         | Salting Out       | 13.41                 | 5          | 5           |
| <i>Taphrorychus bicolor</i>  | Ethanol         | Phenol            | 4.20                  | 5          | 5           |
| <i>Taphrorychus bicolor</i>  | Ethylene glycol | Salting Out       | 11.63                 | 4          | 5           |
| <i>Taphrorychus bicolor</i>  | Ethylene glycol | Phenol            | 2.58                  | 3          | 5           |
| <i>Taphrorychus bicolor</i>  | Glycerine       | Salting Out       | 13.49                 | 5          | 5           |
| <i>Taphrorychus bicolor</i>  | Glycerine       | Phenol            | 5.35                  | 5          | 5           |
| <i>Xyleborus saxeseni</i>    | Copper sulphate | Salting Out       | 3.49                  | 0          | 5           |
| <i>Xyleborus saxeseni</i>    | Copper sulphate | Phenol            | 2.88                  | 0          | 5           |
| <i>Xyleborus saxeseni</i>    | Ethanol         | Salting Out       | 6.89                  | 3          | 5           |
| <i>Xyleborus saxeseni</i>    | Ethanol         | Phenol            | 2.77                  | 0          | 5           |
| <i>Xyleborus saxeseni</i>    | Ethylene glycol | Salting Out       | 7.36                  | 0          | 5           |
| <i>Xyleborus saxeseni</i>    | Ethylene glycol | Phenol            | 2.54                  | 0          | 5           |
| <i>Xyleborus saxeseni</i>    | Glycerine       | Salting Out       | 5.53                  | 0          | 5           |
| <i>Xyleborus saxeseni</i>    | Glycerine       | Phenol            | 2.71                  | 0          | 5           |
| <i>Litargus connexus</i>     | Copper sulphate | Salting Out       | 1.00                  | 1          | 4           |
| <i>Litargus connexus</i>     | Copper sulphate | Phenol            | 0.55                  | 0          | 4           |
| <i>Litargus connexus</i>     | Ethanol         | Salting Out       | 11.88                 | 2          | 5           |
| <i>Litargus connexus</i>     | Ethanol         | Phenol            | 5.65                  | 2          | 5           |
| <i>Litargus connexus</i>     | Ethylene glycol | Salting Out       | 0.60                  | 0          | 5           |
| <i>Litargus connexus</i>     | Ethylene glycol | Phenol            | 1.91                  | 0          | 5           |
| <i>Litargus connexus</i>     | Glycerine       | Salting Out       | 1.06                  | 0          | 4           |
| <i>Litargus connexus</i>     | Glycerine       | Phenol            | 5.92                  | 1          | 4           |

## References

1. Sunnucks P, Hales DF (1996) Numerous transposed sequences of mitochondrial cytochrome oxidase I-II in aphids of the genus *Sitobion* (Hemiptera: Aphididae). *Molecular Biology and Evolution* 13: 510-524.
