# Supplementary material for: Searching for the Optimal Sampling Solution: Variation in Invertebrate Communities, Sample Condition and DNA Quality
Source: PubMed Central journal article supplement (PMC4740435; doi:10.1371/journal.pone.0148247), 2016-02-03
Supplement: pone.0148247.s004.pdf [file pone.0148247.s004.pdf]

## Supplementary S4: Detailed results on order level

**Table A:** Number of individuals collected in the Beech and Spruce understory and canopy traps, by order.

|                         | <u>Beech</u>           |               |                        |               |                    |               | <u>Spruce</u>          |               |                        |               |                    |               | <b>Total</b> |
|-------------------------|------------------------|---------------|------------------------|---------------|--------------------|---------------|------------------------|---------------|------------------------|---------------|--------------------|---------------|--------------|
|                         | <u>Copper sulphate</u> |               | <u>Ethylene glycol</u> |               | <u>Renner</u>      |               | <u>Copper sulphate</u> |               | <u>Ethylene glycol</u> |               | <u>Renner</u>      |               |              |
|                         | <u>Under story</u>     | <u>Canopy</u> | <u>Under story</u>     | <u>Canopy</u> | <u>Under story</u> | <u>Canopy</u> | <u>Under story</u>     | <u>Canopy</u> | <u>Under story</u>     | <u>Canopy</u> | <u>Under story</u> | <u>Canopy</u> |              |
| <b>Acari</b>            | 1068                   | 44            | 398                    | 54            | 926                | 44            | 264                    | 89            | 178                    | 125           | 4341               | 58            | <b>7589</b>  |
| <b>Araneae</b>          | 156                    | 18            | 82                     | 23            | 76                 | 32            | 48                     | 49            | 65                     | 39            | 76                 | 41            | <b>705</b>   |
| <b>Chilopoda</b>        | 0                      | 0             | 0                      | 2             | 0                  | 0             | 1                      | 0             | 0                      | 1             | 1                  | 0             | <b>5</b>     |
| <b>Coleoptera</b>       | 351                    | 240           | 287                    | 176           | 811                | 238           | 667                    | 341           | 674                    | 215           | 1218               | 214           | <b>5432</b>  |
| <b>Collembola</b>       | 678                    | 67            | 337                    | 89            | 330                | 60            | 442                    | 186           | 1221                   | 187           | 639                | 217           | <b>4453</b>  |
| <b>Dermaptera</b>       | 6                      | 3             | 7                      | 3             | 6                  | 1             | 2                      | 0             | 0                      | 0             | 0                  | 0             | <b>28</b>    |
| <b>Dictyoptera</b>      | 12                     | 13            | 12                     | 22            | 6                  | 19            | 8                      | 12            | 8                      | 11            | 8                  | 8             | <b>139</b>   |
| <b>Diplopoda</b>        | 0                      | 1             | 3                      | 0             | 4                  | 0             | 1                      | 0             | 0                      | 0             | 5                  | 0             | <b>14</b>    |
| <b>Diptera</b>          | 1314                   | 1943          | 1414                   | 4775          | 1173               | 2193          | 3438                   | 3027          | 2191                   | 4535          | 1975               | 12357         | <b>40335</b> |
| <b>Ephemeroptera</b>    | 0                      | 0             | 0                      | 0             | 0                  | 0             | 0                      | 3             | 3                      | 7             | 1                  | 3             | <b>17</b>    |
| <b>Gastropoda</b>       | 12                     | 3             | 14                     | 0             | 6                  | 6             | 2                      | 0             | 1                      | 0             | 0                  | 0             | <b>44</b>    |
| <b>Hemiptera</b>        | 177                    | 282           | 104                    | 266           | 109                | 217           | 467                    | 354           | 483                    | 290           | 419                | 300           | <b>3468</b>  |
| <b>Hymenoptera</b>      | 130                    | 70            | 110                    | 74            | 78                 | 113           | 201                    | 63            | 149                    | 46            | 161                | 57            | <b>1252</b>  |
| <b>Isopoda</b>          | 17                     | 0             | 19                     | 1             | 12                 | 0             | 32                     | 2             | 25                     | 0             | 9                  | 3             | <b>120</b>   |
| <b>Lepidoptera</b>      | 10                     | 29            | 7                      | 19            | 7                  | 10            | 14                     | 9             | 22                     | 7             | 11                 | 17            | <b>162</b>   |
| <b>Mecoptera</b>        | 0                      | 0             | 1                      | 2             | 0                  | 0             | 0                      | 23            | 3                      | 20            | 1                  | 20            | <b>70</b>    |
| <b>Megaloptera</b>      | 0                      | 0             | 0                      | 0             | 0                  | 0             | 0                      | 7             | 0                      | 18            | 1                  | 3             | <b>29</b>    |
| <b>Neuroptera</b>       | 1                      | 3             | 0                      | 1             | 1                  | 1             | 3                      | 1             | 2                      | 24            | 1                  | 1             | <b>39</b>    |
| <b>Odonata</b>          | 0                      | 0             | 3                      | 0             | 0                  | 0             | 0                      | 2             | 0                      | 0             | 0                  | 0             | <b>5</b>     |
| <b>Oligochaeta</b>      | 1                      | 1             | 1                      | 1             | 1                  | 0             | 0                      | 0             | 0                      | 1             | 0                  | 0             | <b>6</b>     |
| <b>Opiliones</b>        | 5                      | 0             | 0                      | 0             | 2                  | 0             | 1                      | 2             | 2                      | 3             | 5                  | 2             | <b>22</b>    |
| <b>Orthoptera</b>       | 0                      | 1             | 0                      | 0             | 1                  | 0             | 2                      | 0             | 0                      | 0             | 20                 | 0             | <b>24</b>    |
| <b>Plecoptera</b>       | 0                      | 1             | 0                      | 1             | 0                  | 0             | 2                      | 6             | 3                      | 13            | 0                  | 10            | <b>36</b>    |
| <b>Pseudoscorpiones</b> | 0                      | 0             | 2                      | 0             | 1                  | 0             | 1                      | 0             | 0                      | 0             | 0                  | 6             | <b>10</b>    |
| <b>Psocoptera</b>       | 24                     | 38            | 15                     | 24            | 15                 | 23            | 134                    | 94            | 114                    | 77            | 112                | 92            | <b>762</b>   |
| <b>Raphidioptera</b>    | 0                      | 0             | 0                      | 0             | 0                  | 0             | 1                      | 0             | 1                      | 1             | 0                  | 0             | <b>3</b>     |
| <b>Siphonaptera</b>     | 0                      | 0             | 0                      | 0             | 0                  | 0             | 0                      | 0             | 0                      | 1             | 0                  | 0             | <b>1</b>     |
| <b>Thysanoptera</b>     | 2067                   | 2321          | 1500                   | 1528          | 1479               | 1755          | 257                    | 290           | 162                    | 51            | 156                | 245           | <b>11811</b> |
| <b>Trichoptera</b>      | 1                      | 2             | 0                      | 0             | 0                  | 1             | 0                      | 2             | 0                      | 0             | 0                  | 1             | <b>7</b>     |
