# Supplementary material for: Searching for the Optimal Sampling Solution: Variation in Invertebrate Communities, Sample Condition and DNA Quality
Source: PubMed Central journal article supplement (PMC4740435; doi:10.1371/journal.pone.0148247), 2016-02-03
Supplement: pone.0148247.s005.pdf [file pone.0148247.s005.pdf]

## Supplementary S5: Detailed results regarding sample condition

**Table A:** Summary of the results for sample condition

| Source                              | Sample Condition |       |                |
|-------------------------------------|------------------|-------|----------------|
|                                     | df               | F     | P              |
| Tree species                        | 1,18             | 24.56 | < <b>0.001</b> |
| Solution                            | 2,36             | 26.55 | < <b>0.001</b> |
| Trap type                           | 1,54             | 0.41  | 0.523          |
| Jar                                 | 1,110            | 33.97 | < <b>0.001</b> |
| Tree species x solution             | 2,36             | 4.64  | <b>0.016</b>   |
| Tree species x trap type            | 1,54             | 0.01  | 0.985          |
| Solution x trap type                | 2,54             | 0.59  | 0.560          |
| Tree species x jar                  | 1,110            | 0.92  | 0.340          |
| Solution x jar                      | 2,110            | 15.45 | < <b>0.001</b> |
| Trap type x jar                     | 2,110            | 8.92  | <b>0.004</b>   |
| Tree species x solution x trap type | 2,54             | 4.69  | <b>0.013</b>   |

All interactions were tested, ones not shown were not retained in the minimum adequate model. Significant ( $P < 0.05$ ) terms are highlighted in bold.

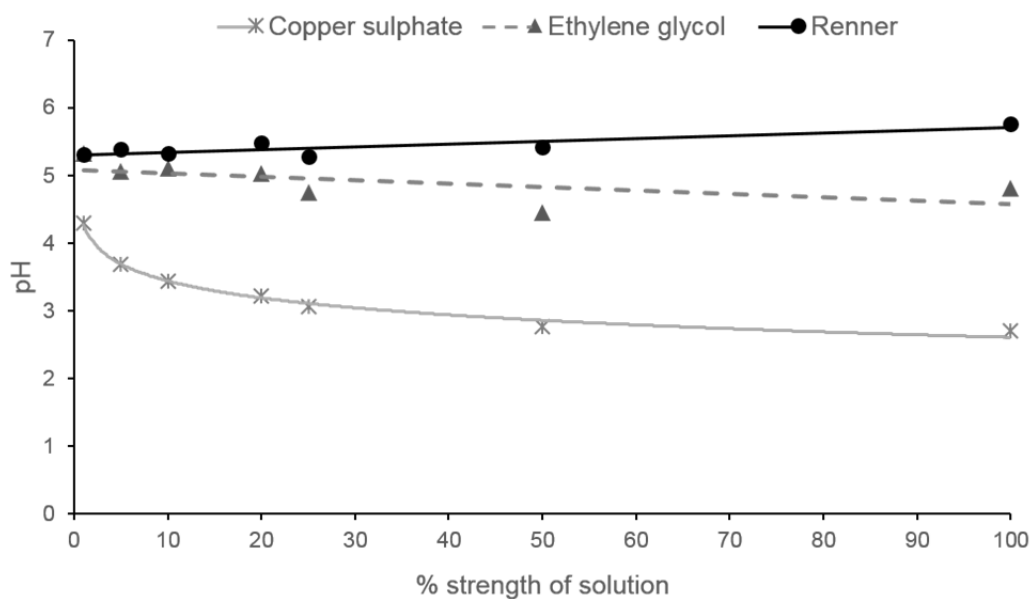

**Figure A:** Dilution curves of the sampling solutions. 100% strength means the same solution strength as used in the field. Samples were tested at 50, 25, 20, 10, 5 and 1% of the original solution strength. Only copper sulphate experienced a change in pH when the solution is diluted, particularly from 25% of the original. All dilutions were made with double-distilled water.
