# Supplementary material for: Searching for the Optimal Sampling Solution: Variation in Invertebrate Communities, Sample Condition and DNA Quality
Source: PubMed Central journal article supplement (PMC4740435; doi:10.1371/journal.pone.0148247), 2016-02-03
Supplement: pone.0148247.s006.pdf [file pone.0148247.s006.pdf]

## Supplementary S6: Detailed results on insect community measures

### *Effect of sampling solution on species richness*

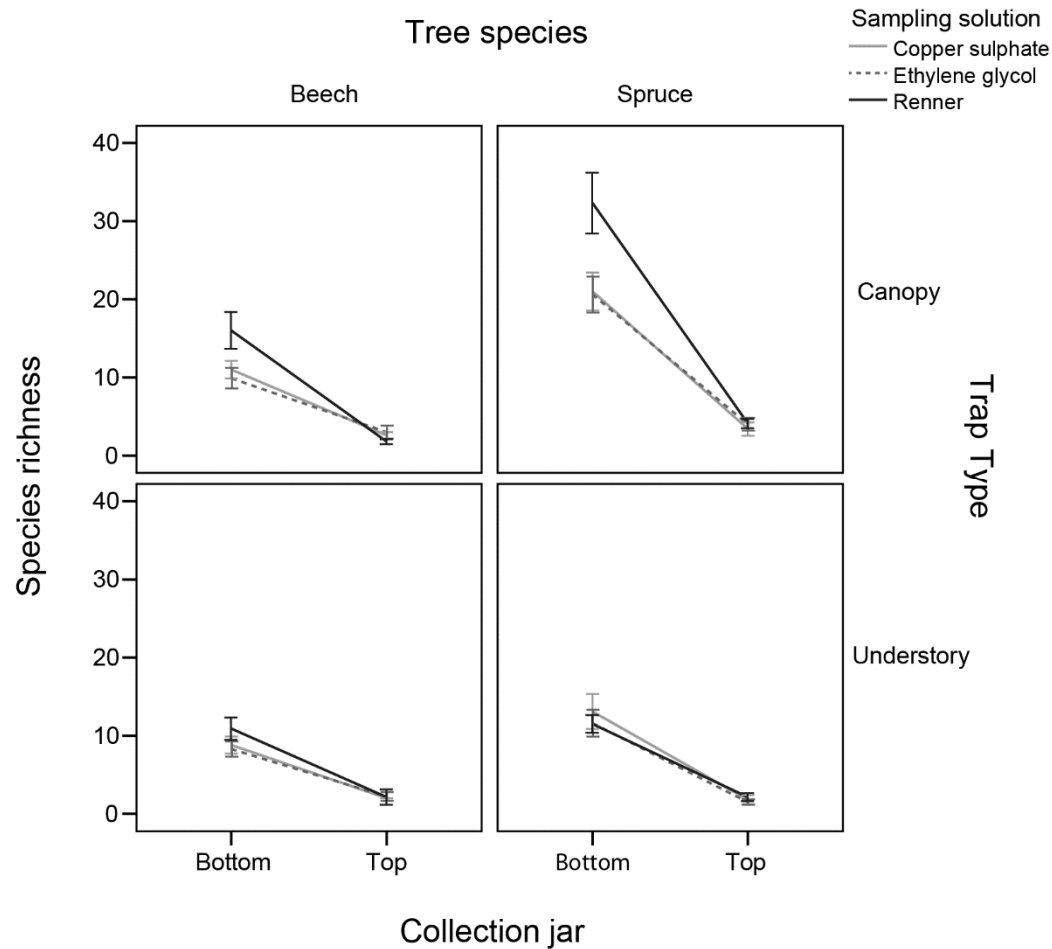

**Figure A:** The species richness of Coleoptera samples collected, across all treatments. A significant 3-way interaction ( $P=0.05$ ) was found between tree species, sampling solution and jar for the species richness but not the diversity of Coleoptera. Error bars represent  $\pm 1$ SE.

**Table A:** Species positions along the first and second RLQ axis (sorted by RLQ1) referring to Figs 2 and 3 of the main manuscript. Additionally mean body size as well as feeding and habitat traits of species are given.

| Order      | Suborder  | Family         | SpeciesID                       | RLQ1   | RLQ2   | BodySize | Feeding | Habitat |
|------------|-----------|----------------|---------------------------------|--------|--------|----------|---------|---------|
| Coleoptera | Polyphaga | Cerambycidae   | <i>Oxymirus cursor</i>          | -1.265 | -3.093 | 23       | dx      | do      |
| Coleoptera | Polyphaga | Elateridae     | <i>Agriotes pilosellus</i>      | -1.240 | -0.152 | 14.75    | h       | v       |
| Coleoptera | Polyphaga | Cantharidae    | <i>Podabrus alpinus</i>         | -1.113 | -1.237 | 12.5     | c       | v       |
| Coleoptera | Polyphaga | Elateridae     | <i>Athous haemorrhoidalis</i>   | -1.104 | 0.145  | 12.25    | h       | v       |
| Coleoptera | Polyphaga | Cantharidae    | <i>Cantharis pellucida</i>      | -1.073 | -1.149 | 11.75    | c       | v       |
| Coleoptera | Polyphaga | Cleridae       | <i>Opilo mollis</i>             | -1.038 | -1.217 | 10.75    | c       | do      |
| Coleoptera | Polyphaga | Lycidae        | <i>Dictyopterus aurora</i>      | -1.025 | -1.187 | 10.5     | c       | do      |
| Coleoptera | Polyphaga | Elateridae     | <i>Athous vittatus</i>          | -0.996 | 0.382  | 10.25    | h       | v       |
| Coleoptera | Polyphaga | Cantharidae    | <i>Metacantharis discoidea</i>  | -0.977 | -0.941 | 10       | c       | v       |
| Coleoptera | Polyphaga | Cantharidae    | <i>Rhagonycha translucida</i>   | -0.977 | -0.941 | 10       | c       | v       |
| Coleoptera | Polyphaga | Cantharidae    | <i>Cantharis nigricans</i>      | -0.950 | -0.882 | 9.5      | c       | v       |
| Coleoptera | Polyphaga | Elateridae     | <i>Melanotus castanipes</i>     | -0.939 | -2.381 | 17       | dx      | do      |
| Coleoptera | Polyphaga | Elateridae     | <i>Athous subfuscus</i>         | -0.936 | 0.513  | 9.15     | h       | v       |
| Coleoptera | Polyphaga | Staphylinidae  | <i>Quedius xanthopus</i>        | -0.916 | -0.950 | 8.5      | c       | do      |
| Coleoptera | Polyphaga | Curculionidae  | <i>Phyllobius pomaceus</i>      | -0.901 | 0.590  | 8.5      | h       | v       |
| Coleoptera | Polyphaga | Coccinellidae  | <i>Anatis ocellata</i>          | -0.896 | -0.763 | 8.5      | c       | v       |
| Coleoptera | Polyphaga | Staphylinidae  | <i>Quedius mesomelinus</i>      | -0.896 | -1.640 | 9        | c       | e       |
| Coleoptera | Polyphaga | Curculionidae  | <i>Curculio pellitus</i>        | -0.873 | 0.649  | 8        | h       | v       |
| Coleoptera | Polyphaga | Curculionidae  | <i>Curculio venosus</i>         | -0.873 | 0.649  | 8        | h       | v       |
| Coleoptera | Polyphaga | Coccinellidae  | <i>Myzia oblongoguttata</i>     | -0.869 | -0.704 | 8        | c       | v       |
| Coleoptera | Polyphaga | Staphylinidae  | <i>Quedius maurus</i>           | -0.861 | -0.831 | 7.5      | c       | do      |
| Coleoptera | Polyphaga | Staphylinidae  | <i>Philonthus cognatus</i>      | -0.857 | -1.417 | 9.75     | c       | g       |
| Coleoptera | Polyphaga | Curculionidae  | <i>Otiorhynchus singularis</i>  | -0.846 | 0.709  | 7.5      | h       | v       |
| Coleoptera | Polyphaga | Staphylinidae  | <i>Atrecus affinis</i>          | -0.821 | -0.742 | 6.75     | c       | do      |
| Coleoptera | Polyphaga | Elateridae     | <i>Agriotes acuminatus</i>      | -0.819 | 0.768  | 7        | h       | v       |
| Coleoptera | Polyphaga | Curculionidae  | <i>Phyllobius arborator</i>     | -0.819 | 0.768  | 7        | h       | v       |
| Coleoptera | Polyphaga | Elateridae     | <i>Ampedus sanguineus</i>       | -0.817 | -2.114 | 14.75    | dx      | do      |
| Coleoptera | Polyphaga | Cantharidae    | <i>Cantharis decipiens</i>      | -0.814 | -0.585 | 7        | c       | v       |
| Coleoptera | Polyphaga | Coccinellidae  | <i>Harmonia axyridis</i>        | -0.814 | -0.585 | 7        | c       | v       |
| Coleoptera | Adephaga  | Carabidae      | <i>Amara ovata</i>              | -0.808 | 0.054  | 8.75     | h       | g       |
| Coleoptera | Adephaga  | Carabidae      | <i>Amara similata</i>           | -0.808 | 0.054  | 8.75     | h       | g       |
| Coleoptera | Polyphaga | Cryptophagidae | <i>Micrambe abietis</i>         | -0.807 | -1.688 | 2.3      | mm      | wf      |
| Coleoptera | Polyphaga | Elateridae     | <i>Kibunea minutus</i>          | -0.805 | 0.797  | 6.75     | h       | v       |
| Coleoptera | Polyphaga | Elateridae     | <i>Dalopius marginatus</i>      | -0.801 | -0.555 | 6.75     | c       | v       |
| Coleoptera | Polyphaga | Curculionidae  | <i>Polydrusus impar</i>         | -0.797 | 0.815  | 6.6      | h       | v       |
| Coleoptera | Polyphaga | Cryptophagidae | <i>Atomaria procerula</i>       | -0.796 | -1.664 | 2.1      | mm      | wf      |
| Coleoptera | Polyphaga | Latridiidae    | <i>Corticaria abietorum</i>     | -0.790 | -1.652 | 2        | mm      | wf      |
| Coleoptera | Polyphaga | Latridiidae    | <i>Stephostethus rugicollis</i> | -0.779 | -1.628 | 1.8      | mm      | wf      |

|            |           |                |                                    |        |        |      |    |    |
|------------|-----------|----------------|------------------------------------|--------|--------|------|----|----|
| Coleoptera | Polyphaga | Tenebrionidae  | <i>Stenomax aeneus</i>             | -0.776 | -2.025 | 14   | dx | do |
| Coleoptera | Adephaga  | Carabidae      | <i>Dromius agilis</i>              | -0.765 | -0.478 | 6.1  | c  | v  |
| Coleoptera | Polyphaga | Cantharidae    | <i>Rhagonycha lignosa</i>          | -0.760 | -0.466 | 6    | c  | v  |
| Coleoptera | Polyphaga | Latridiidae    | <i>Corticarina lambiana</i>        | -0.755 | -1.575 | 1.35 | mm | wf |
| Coleoptera | Polyphaga | Melyridae      | <i>Dasytes caeruleus</i>           | -0.753 | -0.594 | 5.5  | c  | do |
| Coleoptera | Polyphaga | Curculionidae  | <i>Curculio glandium</i>           | -0.751 | 0.916  | 5.75 | h  | v  |
| Coleoptera | Polyphaga | Staphylinidae  | <i>Bolitochara obliqua</i>         | -0.742 | -1.670 | 3.6  | c  | wf |
| Coleoptera | Polyphaga | Omalisidae     | <i>Omalisus fontisbellaquaei</i>   | -0.735 | -1.151 | 7.5  | c  | g  |
| Coleoptera | Polyphaga | Cantharidae    | <i>Rhagonycha testacea</i>         | -0.733 | -0.407 | 5.5  | c  | v  |
| Coleoptera | Polyphaga | Staphylinidae  | <i>Gabrius splendidulus</i>        | -0.725 | -0.535 | 5    | c  | do |
| Coleoptera | Polyphaga | Silvanidae     | <i>Uleiota planata</i>             | -0.725 | -0.535 | 5    | c  | do |
| Coleoptera | Polyphaga | Elateridae     | <i>Melanotus rufipes</i>           | -0.721 | -1.906 | 13   | dx | do |
| Coleoptera | Polyphaga | Cantharidae    | <i>Rhagonycha atra</i>             | -0.719 | -0.377 | 5.25 | c  | v  |
| Coleoptera | Adephaga  | Carabidae      | <i>Amara plebeja</i>               | -0.713 | 0.262  | 7    | h  | g  |
| Coleoptera | Polyphaga | Curculionidae  | <i>Otiorhynchus scaber</i>         | -0.710 | 1.005  | 5    | h  | v  |
| Coleoptera | Polyphaga | Curculionidae  | <i>Polydrusus undatus</i>          | -0.710 | 1.005  | 5    | h  | v  |
| Coleoptera | Polyphaga | Cryptophagidae | <i>Cryptophagus dorsalis</i>       | -0.708 | -0.374 | 2.2  | mm | do |
| Coleoptera | Polyphaga | Cantharidae    | <i>Malthodes marginatus</i>        | -0.698 | -0.476 | 4.5  | c  | do |
| Coleoptera | Polyphaga | Cryptophagidae | <i>Atomaria ornata</i>             | -0.697 | -0.351 | 2    | mm | do |
| Coleoptera | Polyphaga | Curculionidae  | <i>Phyllobius argentatus</i>       | -0.697 | 1.035  | 4.75 | h  | v  |
| Coleoptera | Polyphaga | Curculionidae  | <i>Strophosoma melanogrammum</i>   | -0.697 | 1.035  | 4.75 | h  | v  |
| Coleoptera | Polyphaga | Melyridae      | <i>Aplocnemus nigricornis</i>      | -0.693 | -0.464 | 4.4  | c  | do |
| Coleoptera | Polyphaga | Cryptophagidae | <i>Cryptophagus pilosus</i>        | -0.691 | -1.070 | 2.75 | mm | e  |
| Coleoptera | Polyphaga | Cryptophagidae | <i>Atomaria turgida</i>            | -0.689 | -0.333 | 1.85 | mm | do |
| Coleoptera | Adephaga  | Carabidae      | <i>Pterostichus vernalis</i>       | -0.689 | -1.050 | 6.65 | c  | g  |
| Coleoptera | Polyphaga | Elateridae     | <i>Agriotes pallidulus</i>         | -0.688 | 1.053  | 4.6  | h  | v  |
| Coleoptera | Polyphaga | Staphylinidae  | <i>Atheta myrmecobia</i>           | -0.677 | -1.528 | 2.4  | c  | wf |
| Coleoptera | Polyphaga | Latridiidae    | <i>Stephostethus angusticollis</i> | -0.677 | -1.040 | 2.5  | mm | e  |
| Coleoptera | Polyphaga | Melyridae      | <i>Dasytes plumbeus</i>            | -0.674 | -0.422 | 4.05 | c  | do |
| Coleoptera | Polyphaga | Byturidae      | <i>Byturus ochraceus</i>           | -0.672 | 1.088  | 4.3  | h  | v  |
| Coleoptera | Polyphaga | Cryptophagidae | <i>Cryptophagus dentatus</i>       | -0.672 | -1.028 | 2.4  | mm | e  |
| Coleoptera | Polyphaga | Melyridae      | <i>Dasytes aeratus</i>             | -0.671 | -0.416 | 4    | c  | do |
| Coleoptera | Polyphaga | Cantharidae    | <i>Malthinus frontalis</i>         | -0.671 | -0.416 | 4    | c  | do |
| Coleoptera | Polyphaga | Cryptophagidae | <i>Cryptophagus scanicus</i>       | -0.666 | -1.016 | 2.3  | mm | e  |
| Coleoptera | Polyphaga | Coccinellidae  | <i>Adalia decempunctata</i>        | -0.665 | -0.259 | 4.25 | c  | v  |
| Coleoptera | Polyphaga | Coccinellidae  | <i>Aphidecta oblitterata</i>       | -0.659 | -0.247 | 4.15 | c  | v  |
| Coleoptera | Polyphaga | Cimberidae     | <i>Cimberis attelaboides</i>       | -0.656 | 1.124  | 4    | h  | v  |
| Coleoptera | Polyphaga | Chrysomelidae  | <i>Oulema melanopus</i>            | -0.656 | 1.124  | 4    | h  | v  |
| Coleoptera | Polyphaga | Rhizophagidae  | <i>Rhizophagus nitidulus</i>       | -0.652 | -0.375 | 3.65 | c  | do |
| Coleoptera | Polyphaga | Coccinellidae  | <i>Exochomus quadripustulatus</i>  | -0.651 | -0.229 | 4    | c  | v  |
| Coleoptera | Polyphaga | Latridiidae    | <i>Cartodere nodifer</i>           | -0.650 | -0.981 | 2    | mm | e  |
| Coleoptera | Polyphaga | Latridiidae    | <i>Enicmus transversus</i>         | -0.650 | -0.981 | 2    | mm | e  |
| Coleoptera | Polyphaga | Ptiliidae      | <i>Ptenidium laevigatum</i>        | -0.649 | -0.244 | 1.1  | mm | do |

|            |           |                |                                   |        |        |       |    |    |
|------------|-----------|----------------|-----------------------------------|--------|--------|-------|----|----|
| Coleoptera | Polyphaga | Cryptophagidae | <i>Cryptophagus distinguendus</i> | -0.645 | -0.969 | 1.9   | mm | e  |
| Coleoptera | Polyphaga | Cryptophagidae | <i>Atomaria analis</i>            | -0.642 | -0.963 | 1.85  | mm | e  |
| Coleoptera | Polyphaga | Curculionidae  | <i>Barypeithes pellucidus</i>     | -0.642 | 1.153  | 3.75  | h  | v  |
| Coleoptera | Polyphaga | Ptiliidae      | <i>Baeocrara variolosa</i>        | -0.640 | -0.226 | 0.95  | mm | do |
| Coleoptera | Polyphaga | Latridiidae    | <i>Enicmus histrio</i>            | -0.636 | -0.951 | 1.75  | mm | e  |
| Coleoptera | Polyphaga | Cryptophagidae | <i>Atomaria atricapilla</i>       | -0.634 | -0.945 | 1.7   | mm | e  |
| Coleoptera | Polyphaga | Byturidae      | <i>Byturus tomentosus</i>         | -0.634 | 1.171  | 3.6   | h  | v  |
| Coleoptera | Polyphaga | Ptiliidae      | <i>Pteryx suturalis</i>           | -0.632 | -0.208 | 0.8   | mm | do |
| Coleoptera | Polyphaga | Cryptophagidae | <i>Atomaria fuscata</i>           | -0.631 | -0.939 | 1.65  | mm | e  |
| Coleoptera | Polyphaga | Latridiidae    | <i>Corticarina fuscula</i>        | -0.631 | -0.939 | 1.65  | mm | e  |
| Coleoptera | Polyphaga | Elateridae     | <i>Anostirus purpureus</i>        | -0.626 | -1.699 | 11.25 | dx | do |
| Coleoptera | Polyphaga | Latridiidae    | <i>Dienerella clathrata</i>       | -0.626 | -0.927 | 1.55  | mm | e  |
| Coleoptera | Polyphaga | Curculionidae  | <i>Hypera nigrirostris</i>        | -0.623 | 1.195  | 3.4   | h  | v  |
| Coleoptera | Polyphaga | Staphylinidae  | <i>Euryusa castanoptera</i>       | -0.617 | -0.298 | 3     | c  | do |
| Coleoptera | Polyphaga | Cantharidae    | <i>Malthodes spathifer</i>        | -0.617 | -0.298 | 3     | c  | do |
| Coleoptera | Polyphaga | Bothrideridae  | <i>Oxylaemus variolosus</i>       | -0.617 | -0.298 | 3     | c  | do |
| Coleoptera | Polyphaga | Latridiidae    | <i>Corticarina similata</i>       | -0.615 | -0.904 | 1.35  | mm | e  |
| Coleoptera | Polyphaga | Staphylinidae  | <i>Eusphalerum abdominale</i>     | -0.615 | 1.213  | 3.25  | h  | v  |
| Coleoptera | Polyphaga | Staphylinidae  | <i>Leptusa pulchella</i>          | -0.614 | -0.292 | 2.95  | c  | do |
| Coleoptera | Polyphaga | Staphylinidae  | <i>Philonthus albipes</i>         | -0.613 | -0.884 | 5.25  | c  | g  |
| Coleoptera | Polyphaga | Latridiidae    | <i>Cortinicara gibbosa</i>        | -0.612 | -0.898 | 1.3   | mm | e  |
| Coleoptera | Polyphaga | Curculionidae  | <i>Rhynchaenus quercus</i>        | -0.612 | 1.219  | 3.2   | h  | v  |
| Coleoptera | Polyphaga | Curculionidae  | <i>Stereonychus fraxini</i>       | -0.607 | 1.230  | 3.1   | h  | v  |
| Coleoptera | Polyphaga | Corylophidae   | <i>Orthoperus mundus</i>          | -0.601 | -1.362 | 1     | c  | wf |
| Coleoptera | Polyphaga | Staphylinidae  | <i>Leptusa fumida</i>             | -0.600 | -0.262 | 2.7   | c  | do |
| Coleoptera | Polyphaga | Curculionidae  | <i>Anthonomus phyllocola</i>      | -0.599 | 1.248  | 2.95  | h  | v  |
| Coleoptera | Polyphaga | Elateridae     | <i>Denticollis linearis</i>       | -0.599 | -1.639 | 10.75 | dx | do |
| Coleoptera | Polyphaga | Silvanidae     | <i>Silvanoprus fagi</i>           | -0.598 | -0.256 | 2.65  | c  | do |
| Coleoptera | Polyphaga | Corylophidae   | <i>Orthoperus atomus</i>          | -0.597 | -1.354 | 0.935 | c  | wf |
| Coleoptera | Polyphaga | Coccinellidae  | <i>Rhizophagus chrysomeloides</i> | -0.597 | -0.110 | 3     | c  | v  |
| Coleoptera | Polyphaga | Latridiidae    | <i>Cartodere constricta</i>       | -0.590 | -0.711 | 2.35  | mm | g  |
| Coleoptera | Polyphaga | Elateridae     | <i>Ampedus pomorum</i>            | -0.585 | -1.610 | 10.5  | dx | do |
| Coleoptera | Polyphaga | Anthribidae    | <i>Brachytarsus nebulosus</i>     | -0.583 | -0.081 | 2.75  | c  | v  |
| Coleoptera | Polyphaga | Nitidulidae    | <i>Meligethes denticulatus</i>    | -0.582 | 1.284  | 2.65  | h  | v  |
| Coleoptera | Polyphaga | Curculionidae  | <i>Rhynchaenus fagi</i>           | -0.580 | 1.290  | 2.6   | h  | v  |
| Coleoptera | Polyphaga | Coccinellidae  | <i>Scymnus abietis</i>            | -0.575 | -0.063 | 2.6   | c  | v  |
| Coleoptera | Polyphaga | Staphylinidae  | <i>Mycetoporus lepidus</i>        | -0.572 | -0.795 | 4.5   | c  | g  |
| Coleoptera | Polyphaga | Rhynchitidae   | <i>Caenorhinus germanicus</i>     | -0.571 | 1.308  | 2.45  | h  | v  |
| Coleoptera | Polyphaga | Nitidulidae    | <i>Epuraea melanocephala</i>      | -0.569 | -0.051 | 2.5   | c  | v  |
| Coleoptera | Polyphaga | Cerylonidae    | <i>Cerylon histeroides</i>        | -0.565 | -0.185 | 2.05  | c  | do |
| Coleoptera | Polyphaga | Staphylinidae  | <i>Leptusa norvegica</i>          | -0.562 | -0.179 | 2     | c  | do |
| Coleoptera | Polyphaga | Staphylinidae  | <i>Phyllodrepa ioptera</i>        | -0.562 | -0.179 | 2     | c  | do |
| Coleoptera | Polyphaga | Pselaphidae    | <i>Trichonyx sulcicollis</i>      | -0.562 | -0.179 | 2     | c  | do |

|            |           |                |                                   |        |        |       |    |    |
|------------|-----------|----------------|-----------------------------------|--------|--------|-------|----|----|
| Coleoptera | Polyphaga | Cryptophagidae | <i>Atomaria nigrirostris</i>      | -0.560 | -0.646 | 1.8   | mm | g  |
| Coleoptera | Polyphaga | Cerylonidae    | <i>Cerylon ferrugineum</i>        | -0.557 | -0.167 | 1.9   | c  | do |
| Coleoptera | Polyphaga | Nitidulidae    | <i>Epuraea unicolor</i>           | -0.556 | -0.898 | 2.75  | c  | e  |
| Coleoptera | Polyphaga | Staphylinidae  | <i>Gabrius coxalus</i>            | -0.556 | -0.759 | 4.2   | c  | g  |
| Coleoptera | Polyphaga | Histeridae     | <i>Paromalus flavicornis</i>      | -0.554 | -0.161 | 1.85  | c  | do |
| Coleoptera | Polyphaga | Staphylinidae  | <i>Atheta incognita</i>           | -0.553 | -0.753 | 4.15  | c  | g  |
| Coleoptera | Polyphaga | Staphylinidae  | <i>Heterothops dissimilis</i>     | -0.553 | -0.753 | 4.15  | c  | g  |
| Coleoptera | Polyphaga | Nitidulidae    | <i>Meligethes aeneus</i>          | -0.552 | 1.349  | 2.1   | h  | v  |
| Coleoptera | Polyphaga | Nitidulidae    | <i>Meligethes nigrescens</i>      | -0.552 | 1.349  | 2.1   | h  | v  |
| Coleoptera | Polyphaga | Nitidulidae    | <i>Meligethes pedicularius</i>    | -0.552 | 1.349  | 2.1   | h  | v  |
| Coleoptera | Polyphaga | Staphylinidae  | <i>Leptusa ruficollis</i>         | -0.550 | -0.010 | 2.15  | c  | v  |
| Coleoptera | Polyphaga | Staphylinidae  | <i>Phloeocharis subtilissima</i>  | -0.549 | -0.149 | 1.75  | c  | do |
| Coleoptera | Polyphaga | Chrysomelidae  | <i>Longitarsus kutscherae</i>     | -0.547 | 1.361  | 2     | h  | v  |
| Coleoptera | Polyphaga | Pselaphidae    | <i>Euplectus bescidicus</i>       | -0.546 | -0.143 | 1.7   | c  | do |
| Coleoptera | Polyphaga | Staphylinidae  | <i>Lesteva longoelytrata</i>      | -0.545 | -0.735 | 4     | c  | g  |
| Coleoptera | Polyphaga | Staphylinidae  | <i>Oxyptoda opaca</i>             | -0.545 | -0.735 | 4     | c  | g  |
| Coleoptera | Polyphaga | Staphylinidae  | <i>Eusphalerum sorbi</i>          | -0.539 | 1.379  | 1.85  | h  | v  |
| Coleoptera | Polyphaga | Pselaphidae    | <i>Plectophloeus fischeri</i>     | -0.538 | -0.126 | 1.55  | c  | do |
| Coleoptera | Polyphaga | Cantharidae    | <i>Malthodes pumilus</i>          | -0.530 | -0.108 | 1.4   | c  | do |
| Coleoptera | Polyphaga | Chrysomelidae  | <i>Phyllotreta vittula</i>        | -0.528 | 1.403  | 1.65  | h  | v  |
| Coleoptera | Polyphaga | Pselaphidae    | <i>Bibloporus bicolor</i>         | -0.524 | -0.096 | 1.3   | c  | do |
| Coleoptera | Polyphaga | Pselaphidae    | <i>Euplectus karsteni</i>         | -0.521 | -0.090 | 1.25  | c  | do |
| Coleoptera | Polyphaga | Ptiliidae      | <i>Acrotrichis intermedia</i>     | -0.520 | -0.557 | 1.05  | mm | g  |
| Coleoptera | Polyphaga | Pselaphidae    | <i>Bibloporus minutus</i>         | -0.520 | -0.087 | 1.225 | c  | do |
| Coleoptera | Polyphaga | Staphylinidae  | <i>Scopaeus laevigatus</i>        | -0.517 | -0.676 | 3.5   | c  | g  |
| Coleoptera | Polyphaga | Pselaphidae    | <i>Euplectus punctatus</i>        | -0.508 | -0.060 | 1     | c  | do |
| Coleoptera | Polyphaga | Anthribidae    | <i>Anthribus albinus</i>          | -0.504 | -1.432 | 9     | dx | do |
| Coleoptera | Polyphaga | Staphylinidae  | <i>Habrocerus capillaricornis</i> | -0.504 | -0.646 | 3.25  | c  | g  |
| Coleoptera | Polyphaga | Curculionidae  | <i>Rhinomias forticornis</i>      | -0.481 | 0.766  | 2.75  | h  | g  |
| Coleoptera | Polyphaga | Nitidulidae    | <i>Cryptarcha undata</i>          | -0.480 | 0.034  | 2.6   | c  | ds |
| Coleoptera | Polyphaga | Pyrochroidae   | <i>Schizotus pectinicornis</i>    | -0.477 | -1.372 | 8.5   | dx | do |
| Coleoptera | Polyphaga | Staphylinidae  | <i>Atheta fungi</i>               | -0.469 | -0.569 | 2.6   | c  | g  |
| Coleoptera | Polyphaga | Staphylinidae  | <i>Holobus flavicornis</i>        | -0.467 | -0.705 | 1.12  | c  | e  |
| Coleoptera | Polyphaga | Staphylinidae  | <i>Geostiba circellaris</i>       | -0.466 | -0.563 | 2.55  | c  | g  |
| Coleoptera | Polyphaga | Staphylinidae  | <i>Syntomium aeneum</i>           | -0.463 | -0.557 | 2.5   | c  | g  |
| Coleoptera | Polyphaga | Staphylinidae  | <i>Atheta palustris</i>           | -0.460 | -0.551 | 2.45  | c  | g  |
| Coleoptera | Polyphaga | Elateridae     | <i>Sericus brunneus</i>           | -0.457 | -1.185 | 8.5   | dx | v  |
| Coleoptera | Polyphaga | Staphylinidae  | <i>Amischa analis</i>             | -0.441 | -0.510 | 2.1   | c  | g  |
| Coleoptera | Polyphaga | Pselaphidae    | <i>Brachygluta sinuata</i>        | -0.425 | -0.474 | 1.8   | c  | g  |
| Coleoptera | Polyphaga | Elateridae     | <i>Ampedus nigrinus</i>           | -0.422 | -1.254 | 7.5   | dx | do |
| Coleoptera | Polyphaga | Cerambycidae   | <i>Stenurella melanura</i>        | -0.422 | -1.254 | 7.5   | dx | do |
| Coleoptera | Polyphaga | Elateridae     | <i>Calambus bipustulatus</i>      | -0.417 | -1.242 | 7.4   | dx | do |
| Coleoptera | Polyphaga | Pselaphidae    | <i>Bryaxis curtisii</i>           | -0.411 | -0.445 | 1.55  | c  | g  |

|            |           |                |                                      |        |        |       |    |     |
|------------|-----------|----------------|--------------------------------------|--------|--------|-------|----|-----|
| Coleoptera | Polyphaga | Scydmaenidae   | <i>Neuraphes elongatulus</i>         | -0.406 | -0.433 | 1.45  | c  | g   |
| Coleoptera | Polyphaga | Pselaphidae    | <i>Bryaxis nodicornis</i>            | -0.405 | -0.430 | 1.425 | c  | g   |
| Coleoptera | Polyphaga | Pselaphidae    | <i>Bryaxis puncticollis</i>          | -0.398 | -0.415 | 1.3   | c  | g   |
| Coleoptera | Polyphaga | Pselaphidae    | <i>Bythinus macropalpus</i>          | -0.395 | -0.409 | 1.25  | c  | g   |
| Coleoptera | Polyphaga | Mordellidae    | <i>Tomoxia bucephala</i>             | -0.395 | -1.194 | 7     | dx | do  |
| Coleoptera | Polyphaga | Pselaphidae    | <i>Trimum brevicorne</i>             | -0.395 | -0.409 | 1.25  | c  | g   |
| Coleoptera | Polyphaga | Pselaphidae    | <i>Bythinus burrelli</i>             | -0.392 | -0.403 | 1.2   | c  | g   |
| Coleoptera | Polyphaga | Elateridae     | <i>Ampedus erythrogonus</i>          | -0.368 | -1.135 | 6.5   | dx | do  |
| Coleoptera | Polyphaga | Anobiidae      | <i>Anobium pertinax</i>              | -0.300 | -0.987 | 5.25  | dx | do  |
| Coleoptera | Polyphaga | Mordellidae    | <i>Mordellochroa abdominalis</i>     | -0.300 | -0.987 | 5.25  | dx | do  |
| Coleoptera | Polyphaga | Curculionidae  | <i>Cossonus cylindricus</i>          | -0.286 | -0.957 | 5     | dx | do  |
| Coleoptera | Polyphaga | Eucnemidae     | <i>Eucnemis capucina</i>             | -0.286 | -0.957 | 5     | dx | do  |
| Coleoptera | Polyphaga | Alleculidae    | <i>Mycetochara humeralis</i>         | -0.259 | -0.898 | 4.5   | dx | do  |
| Coleoptera | Polyphaga | Anobiidae      | <i>Ptilinus pectinicornis</i>        | -0.259 | -0.898 | 4.5   | dx | do  |
| Coleoptera | Polyphaga | Scirtidae      | <i>Cyphon coarctatus</i>             | -0.251 | 1.192  | 3.75  | d  | v   |
| Coleoptera | Polyphaga | Anobiidae      | <i>Xestobium plumbeum</i>            | -0.251 | -0.880 | 4.35  | dx | do  |
| Coleoptera | Polyphaga | Scarabaeidae   | <i>Aphodius constans</i>             | -0.240 | 0.478  | 5.5   | d  | g   |
| Coleoptera | Polyphaga | Anobiidae      | <i>Hedobia imperialis</i>            | -0.240 | -0.856 | 4.15  | dx | do  |
| Coleoptera | Polyphaga | Anobiidae      | <i>Anobium emarginatum</i>           | -0.232 | -0.839 | 4     | dx | do  |
| Coleoptera | Polyphaga | Dermestidae    | <i>Megatoma undata</i>               | -0.225 | 1.141  | 5     | d  | ds  |
| Coleoptera | Polyphaga | Curculionidae  | <i>Rhyncolus ater</i>                | -0.218 | -0.809 | 3.75  | dx | do  |
| Coleoptera | Polyphaga | Staphylinidae  | <i>Tachinus elongatus</i>            | -0.209 | -0.825 | 8     | c  | rnf |
| Coleoptera | Polyphaga | Scraptiidae    | <i>Anaspis frontalis</i>             | -0.199 | -0.767 | 3.4   | dx | do  |
| Coleoptera | Polyphaga | Anobiidae      | <i>Ernobius abietis</i>              | -0.180 | -0.726 | 3.05  | dx | do  |
| Coleoptera | Polyphaga | Scraptiidae    | <i>Anaspis rufilabris</i>            | -0.177 | -0.720 | 3     | dx | do  |
| Coleoptera | Polyphaga | Anobiidae      | <i>Anobium rufipenne</i>             | -0.177 | -0.720 | 3     | dx | do  |
| Coleoptera | Polyphaga | Anobiidae      | <i>Episernus granulatus</i>          | -0.177 | -0.720 | 3     | dx | do  |
| Coleoptera | Polyphaga | Scraptiidae    | <i>Anaspis ruficollis</i>            | -0.164 | -0.690 | 2.75  | dx | do  |
| Coleoptera | Polyphaga | Scraptiidae    | <i>Anaspis thoracica</i>             | -0.164 | -0.690 | 2.75  | dx | do  |
| Coleoptera | Polyphaga | Anobiidae      | <i>Ernobius abietinus</i>            | -0.150 | -0.661 | 2.5   | dx | do  |
| Coleoptera | Polyphaga | Silphidae      | <i>Oiceoptoma thoracica</i>          | -0.122 | -0.087 | 13.5  | d  | rnf |
| Coleoptera | Polyphaga | Staphylinidae  | <i>Philonthus concinnus</i>          | -0.114 | -0.618 | 6.25  | c  | rnf |
| Coleoptera | Polyphaga | Nitidulidae    | <i>Glischrochilus quadrisignatus</i> | -0.100 | -0.588 | 6     | c  | rnf |
| Coleoptera | Polyphaga | Histeridae     | <i>Margarinotus striola</i>          | -0.100 | -0.588 | 6     | c  | rnf |
| Coleoptera | Polyphaga | Staphylinidae  | <i>Rugilus rufipes</i>               | -0.086 | -0.558 | 5.75  | c  | rnf |
| Coleoptera | Polyphaga | Staphylinidae  | <i>Tachinus signatus</i>             | -0.086 | -0.558 | 5.75  | c  | rnf |
| Coleoptera | Polyphaga | Ptinidae       | <i>Ptinus subpilosus</i>             | -0.072 | 0.846  | 2.4   | d  | g   |
| Coleoptera | Polyphaga | Dermestidae    | <i>Globicornis nigripes</i>          | -0.062 | 1.497  | 2     | d  | ds  |
| Coleoptera | Polyphaga | Cryptophagidae | <i>Cryptophagus pubescens</i>        | -0.034 | -0.321 | 2.3   | mm | rnf |
| Coleoptera | Polyphaga | Cryptophagidae | <i>Cryptophagus thomsoni</i>         | -0.029 | -0.309 | 2.2   | mm | rnf |
| Coleoptera | Polyphaga | Staphylinidae  | <i>Enalodroma hepatica</i>           | -0.018 | -0.410 | 4.5   | c  | rnf |
| Coleoptera | Polyphaga | Latridiidae    | <i>Latridius anthracinus</i>         | 0.004  | -0.238 | 1.6   | mm | rnf |
| Coleoptera | Polyphaga | Rhizophagidae  | <i>Monotoma longicollis</i>          | 0.007  | -0.232 | 1.55  | mm | rnf |

|            |           |                |                                      |       |        |      |    |     |
|------------|-----------|----------------|--------------------------------------|-------|--------|------|----|-----|
| Coleoptera | Polyphaga | Clambidae      | <i>Clambus armadillo</i>             | 0.029 | -0.184 | 1.15 | mm | rnf |
| Coleoptera | Polyphaga | Staphylinidae  | <i>Oxyroda alternans</i>             | 0.036 | -0.291 | 3.5  | c  | rnf |
| Coleoptera | Polyphaga | Ptiliidae      | <i>Acrotrichis grandicollis</i>      | 0.039 | -0.160 | 0.95 | mm | rnf |
| Coleoptera | Polyphaga | Ptiliidae      | <i>Acrotrichis insularis</i>         | 0.042 | -0.155 | 0.9  | mm | rnf |
| Coleoptera | Polyphaga | Staphylinidae  | <i>Aleochara bipustulata</i>         | 0.050 | -0.262 | 3.25 | c  | rnf |
| Coleoptera | Polyphaga | Staphylinidae  | <i>Atheta crassicornis</i>           | 0.058 | -0.244 | 3.1  | c  | rnf |
| Coleoptera | Adephaga  | Dytiscidae     | <i>Hydroporus palustris</i>          | 0.058 | -0.244 | 3.1  | c  | rnf |
| Coleoptera | Polyphaga | Staphylinidae  | <i>Haploglossa villosula</i>         | 0.063 | -0.232 | 3    | c  | rnf |
| Coleoptera | Polyphaga | Histeridae     | <i>Gnathoncus buyssoni</i>           | 0.074 | -0.208 | 2.8  | c  | rnf |
| Coleoptera | Polyphaga | Staphylinidae  | <i>Atheta sodalis</i>                | 0.077 | -0.202 | 2.75 | c  | rnf |
| Coleoptera | Polyphaga | Staphylinidae  | <i>Atheta nigricornis</i>            | 0.082 | -0.191 | 2.65 | c  | rnf |
| Coleoptera | Polyphaga | Staphylinidae  | <i>Atheta subtilis</i>               | 0.107 | -0.137 | 2.2  | c  | rnf |
| Coleoptera | Polyphaga | Staphylinidae  | <i>Atheta cauta</i>                  | 0.112 | -0.125 | 2.1  | c  | rnf |
| Coleoptera | Polyphaga | Staphylinidae  | <i>Atheta aegra</i>                  | 0.131 | -0.084 | 1.75 | c  | rnf |
| Coleoptera | Polyphaga | Corylophidae   | <i>Sericoderus lateralis</i>         | 0.161 | -0.019 | 1.2  | c  | rnf |
| Coleoptera | Polyphaga | Tenebrionidae  | <i>Bolitophagus reticulatus</i>      | 0.182 | -1.129 | 6.5  | m  | wf  |
| Coleoptera | Polyphaga | Geotrupidae    | <i>Anoplotrupes stercorosus</i>      | 0.204 | 0.625  | 7.5  | d  | rnf |
| Coleoptera | Polyphaga | Nitidulidae    | <i>Cychramus variegatus</i>          | 0.209 | -1.069 | 6    | m  | wf  |
| Coleoptera | Polyphaga | Mycetophagidae | <i>Mycetophagus quadripustulatus</i> | 0.236 | -1.010 | 5.5  | m  | wf  |
| Coleoptera | Polyphaga | Trogidae       | <i>Trox scaber</i>                   | 0.259 | 0.744  | 6.5  | d  | rnf |
| Coleoptera | Polyphaga | Staphylinidae  | <i>Coprophilus striatulus</i>        | 0.286 | 0.803  | 6    | d  | rnf |
| Coleoptera | Polyphaga | Cholevidae     | <i>Catops picipes</i>                | 0.300 | 0.833  | 5.75 | d  | rnf |
| Coleoptera | Polyphaga | Nitidulidae    | <i>Cychramus luteus</i>              | 0.302 | -0.868 | 4.3  | m  | wf  |
| Coleoptera | Polyphaga | Mycetophagidae | <i>Mycetophagus atomarius</i>        | 0.304 | -0.862 | 4.25 | m  | wf  |
| Coleoptera | Polyphaga | Mycetophagidae | <i>Mycetophagus piceus</i>           | 0.318 | -0.832 | 4    | m  | wf  |
| Coleoptera | Polyphaga | Mycetophagidae | <i>Mycetophagus quadriguttatus</i>   | 0.332 | -0.802 | 3.75 | m  | wf  |
| Coleoptera | Polyphaga | Erotylidae     | <i>Tritoma bipustulata</i>           | 0.332 | -0.802 | 3.75 | m  | wf  |
| Coleoptera | Polyphaga | Cisidae        | <i>Cis boleti</i>                    | 0.372 | -0.713 | 3    | m  | wf  |
| Coleoptera | Polyphaga | Cleridae       | <i>Thanasimus formicarius</i>        | 0.380 | -1.357 | 8.5  | c  | df  |
| Coleoptera | Polyphaga | Mycetophagidae | <i>Litargus connexus</i>             | 0.394 | -0.666 | 2.6  | m  | wf  |
| Coleoptera | Polyphaga | Leiodidae      | <i>Anisotoma orbicularis</i>         | 0.400 | -0.654 | 2.5  | m  | wf  |
| Coleoptera | Polyphaga | Cisidae        | <i>Cis punctulatus</i>               | 0.400 | -0.654 | 2.5  | m  | wf  |
| Coleoptera | Polyphaga | Latridiidae    | <i>Stephostethus alternans</i>       | 0.400 | -0.654 | 2.5  | m  | wf  |
| Coleoptera | Polyphaga | Cisidae        | <i>Orthocis alni</i>                 | 0.408 | -0.636 | 2.35 | m  | wf  |
| Coleoptera | Polyphaga | Cisidae        | <i>Cis dentatus</i>                  | 0.411 | -0.630 | 2.3  | m  | wf  |
| Coleoptera | Polyphaga | Cisidae        | <i>Cis hispidus</i>                  | 0.416 | -0.619 | 2.2  | m  | wf  |
| Coleoptera | Polyphaga | Cisidae        | <i>Orthocis festivus</i>             | 0.416 | -0.619 | 2.2  | m  | wf  |
| Coleoptera | Polyphaga | Staphylinidae  | <i>Scaphisoma agaricinum</i>         | 0.416 | -0.619 | 2.2  | m  | wf  |
| Coleoptera | Polyphaga | Cisidae        | <i>Cis castaneus</i>                 | 0.432 | -0.583 | 1.9  | m  | wf  |
| Coleoptera | Polyphaga | Latridiidae    | <i>Latridius hirtus</i>              | 0.432 | -0.583 | 1.9  | m  | wf  |
| Coleoptera | Polyphaga | Cisidae        | <i>Orthocis vestitus</i>             | 0.435 | -0.577 | 1.85 | m  | wf  |
| Coleoptera | Polyphaga | Cerambycidae   | <i>Rhagium inquisitor</i>            | 0.439 | -2.610 | 15.5 | dx | df  |
| Coleoptera | Polyphaga | Cisidae        | <i>Ennearthron cornutum</i>          | 0.443 | -0.559 | 1.7  | m  | wf  |

|            |           |                |                                       |       |        |       |    |     |
|------------|-----------|----------------|---------------------------------------|-------|--------|-------|----|-----|
| Coleoptera | Polyphaga | Staphylinidae  | <i>Omalius caesum</i>                 | 0.449 | 1.159  | 3     | d  | rnf |
| Coleoptera | Polyphaga | Staphylinidae  | <i>Omalius rivulare</i>               | 0.449 | 1.159  | 3     | d  | rnf |
| Coleoptera | Polyphaga | Cholevidae     | <i>Sciodrepoides watsoni</i>          | 0.449 | 1.159  | 3     | d  | rnf |
| Coleoptera | Polyphaga | Colydiidae     | <i>Synchita humeralis</i>             | 0.465 | 0.588  | 3     | m  | do  |
| Coleoptera | Polyphaga | Malachidae     | <i>Anthocomus fasciatus</i>           | 0.472 | 0.746  | 3.25  | m  | v   |
| Coleoptera | Polyphaga | Cleridae       | <i>Thanasimus pectoralis</i>          | 0.475 | -1.150 | 6.75  | c  | df  |
| Coleoptera | Polyphaga | Cisidae        | <i>Orthocis pygmaeus</i>              | 0.481 | -0.476 | 1     | m  | wf  |
| Coleoptera | Polyphaga | Staphylinidae  | <i>Anotylus tetracarinated</i>        | 0.506 | 1.284  | 1.95  | d  | rnf |
| Coleoptera | Polyphaga | Hydrophilidae  | <i>Megasternum obscurum</i>           | 0.506 | 1.284  | 1.95  | d  | rnf |
| Coleoptera | Polyphaga | Throscidae     | <i>Trixagus dermestoides</i>          | 0.510 | -0.048 | 3.05  | m  | e   |
| Coleoptera | Polyphaga | Cerambycidae   | <i>Tetropium castaneum</i>            | 0.547 | -2.373 | 13.5  | dx | df  |
| Coleoptera | Polyphaga | Throscidae     | <i>Trixagus leseigneuri</i>           | 0.567 | 0.076  | 2.0   | m  | NA  |
| Coleoptera | Polyphaga | Throscidae     | <i>Trixagus meyhohmi</i>              | 0.567 | 0.076  | 2.0   | m  | NA  |
| Coleoptera | Polyphaga | Trogositidae   | <i>Nemosoma elongatum</i>             | 0.571 | -0.942 | 5     | c  | df  |
| Coleoptera | Polyphaga | Nitidulidae    | <i>Pityophagus ferrugineus</i>        | 0.571 | -0.942 | 5     | c  | df  |
| Coleoptera | Polyphaga | Nitidulidae    | <i>Glischrochilus quadripunctatus</i> | 0.584 | -0.913 | 4.75  | c  | df  |
| Coleoptera | Polyphaga | Throscidae     | <i>Aulonothroscus brevicollis</i>     | 0.605 | 0.299  | 2.75  | m  | g   |
| Coleoptera | Polyphaga | Cerambycidae   | <i>Callidium aeneum</i>               | 0.629 | -2.195 | 12    | dx | df  |
| Coleoptera | Polyphaga | Lymexylonidae  | <i>Hylecoetus dermestoides</i>        | 0.629 | -2.195 | 12    | dx | df  |
| Coleoptera | Polyphaga | Salpingidae    | <i>Salpingus ruficollis</i>           | 0.630 | -0.812 | 3.9   | c  | df  |
| Coleoptera | Polyphaga | Endomychidae   | <i>Symbiotes latus</i>                | 0.634 | 0.991  | 2     | m  | ds  |
| Coleoptera | Polyphaga | Rhizophagidae  | <i>Rhizophagus ferrugineus</i>        | 0.639 | -0.794 | 3.75  | c  | df  |
| Coleoptera | Polyphaga | Rhizophagidae  | <i>Rhizophagus dispar</i>             | 0.652 | -0.764 | 3.5   | c  | df  |
| Coleoptera | Polyphaga | Rhizophagidae  | <i>Rhizophagus depressus</i>          | 0.658 | -0.752 | 3.4   | c  | df  |
| Coleoptera | Polyphaga | Salpingidae    | <i>Salpingus planirostris</i>         | 0.666 | -0.735 | 3.25  | c  | df  |
| Coleoptera | Polyphaga | Nitidulidae    | <i>Epuraea marseuli</i>               | 0.679 | -0.705 | 3     | c  | df  |
| Coleoptera | Polyphaga | Laemophloeidae | <i>Leptophloeus alternans</i>         | 0.679 | -0.705 | 3     | c  | df  |
| Coleoptera | Polyphaga | Rhizophagidae  | <i>Rhizophagus perforatus</i>         | 0.679 | -0.705 | 3     | c  | df  |
| Coleoptera | Polyphaga | Salpingidae    | <i>Vincenzellus ruficollis</i>        | 0.679 | -0.705 | 3     | c  | df  |
| Coleoptera | Polyphaga | Cerambycidae   | <i>Clytus lama</i>                    | 0.683 | -2.076 | 11    | dx | df  |
| Coleoptera | Polyphaga | Cerambycidae   | <i>Molorchus minor</i>                | 0.683 | -2.076 | 11    | dx | df  |
| Coleoptera | Polyphaga | Rhizophagidae  | <i>Rhizophagus bipustulatus</i>       | 0.685 | -0.693 | 2.9   | c  | df  |
| Coleoptera | Polyphaga | Endomychidae   | <i>Symbiotes gibberosus</i>           | 0.688 | 1.110  | 1     | m  | ds  |
| Coleoptera | Polyphaga | Staphylinidae  | <i>Phloeopora testacea</i>            | 0.693 | -0.675 | 2.75  | c  | df  |
| Coleoptera | Polyphaga | Staphylinidae  | <i>Phloeopora corticalis</i>          | 0.704 | -0.652 | 2.55  | c  | df  |
| Coleoptera | Polyphaga | Staphylinidae  | <i>Ischnoglossa spec.</i>             | 0.707 | -0.646 | 2.5   | c  | df  |
| Coleoptera | Polyphaga | Cerambycidae   | <i>Clytus arietis</i>                 | 0.711 | -2.017 | 10.5  | dx | df  |
| Coleoptera | Polyphaga | Nitidulidae    | <i>Epuraea pygmaea</i>                | 0.720 | -0.616 | 2.25  | c  | df  |
| Coleoptera | Polyphaga | Curculionidae  | <i>Hylobius abietis</i>               | 0.724 | -1.987 | 10.25 | dx | df  |
| Coleoptera | Polyphaga | Staphylinidae  | <i>Placusa tachyporoides</i>          | 0.734 | -0.586 | 2     | c  | df  |
| Coleoptera | Polyphaga | Cerambycidae   | <i>Anaglyptus mysticus</i>            | 0.765 | -1.898 | 9.5   | dx | df  |
| Coleoptera | Polyphaga | Curculionidae  | <i>Pissodes pini</i>                  | 0.882 | -1.643 | 7.35  | dx | df  |
| Coleoptera | Polyphaga | Cerambycidae   | <i>Obrium brunneum</i>                | 0.983 | -1.424 | 5.5   | dx | df  |



|            |           |               |                                   |       |        |      |    |     |
|------------|-----------|---------------|-----------------------------------|-------|--------|------|----|-----|
| Coleoptera | Polyphaga | Cerambycidae  | <i>Pogonocherus decoratus</i>     | 1.010 | -1.364 | 5    | dx | df  |
| Coleoptera | Polyphaga | Curculionidae | <i>Magdalis phlegmatica</i>       | 1.015 | -1.353 | 4.9  | dx | df  |
| Coleoptera | Polyphaga | Scolytidae    | <i>Ips typographus</i>            | 1.018 | -1.347 | 4.85 | dx | df  |
| Coleoptera | Polyphaga | Scolytidae    | <i>Dryocoetes autographus</i>     | 1.072 | -1.228 | 3.85 | dx | df  |
| Coleoptera | Polyphaga | Scolytidae    | <i>Hylastes cunicularius</i>      | 1.072 | -1.228 | 3.85 | dx | df  |
| Coleoptera | Polyphaga | Scolytidae    | <i>Dryocoetes villosus</i>        | 1.119 | -1.127 | 3    | dx | df  |
| Coleoptera | Polyphaga | Scolytidae    | <i>Leperisinus fraxini</i>        | 1.119 | -1.127 | 3    | dx | df  |
| Coleoptera | Polyphaga | Scolytidae    | <i>Scolytus intricatus</i>        | 1.119 | -1.127 | 3    | dx | df  |
| Coleoptera | Polyphaga | Scolytidae    | <i>Hylurgops palliatus</i>        | 1.127 | -1.109 | 2.85 | dx | df  |
| Coleoptera | Polyphaga | Scolytidae    | <i>Polygraphus poligraphus</i>    | 1.140 | -1.080 | 2.6  | dx | df  |
| Coleoptera | Polyphaga | Leiodidae     | <i>Agathidium varians</i>         | 1.159 | 0.683  | 2.75 | m  | rnf |
| Coleoptera | Polyphaga | Scolytidae    | <i>Pityogenes chalcographus</i>   | 1.165 | -1.026 | 2.15 | dx | df  |
| Coleoptera | Polyphaga | Anobiidae     | <i>Dryophilus pusillus</i>        | 1.168 | -1.020 | 2.1  | dx | df  |
| Coleoptera | Polyphaga | Scolytidae    | <i>Taphrorychus bicolor</i>       | 1.170 | -1.015 | 2.05 | dx | df  |
| Coleoptera | Polyphaga | Leiodidae     | <i>Agathidium seminulum</i>       | 1.186 | 0.743  | 2.25 | m  | rnf |
| Coleoptera | Polyphaga | Scolytidae    | <i>Ernoporicus fagi</i>           | 1.187 | -0.979 | 1.75 | dx | df  |
| Coleoptera | Polyphaga | Scolytidae    | <i>Cryphalus piceae</i>           | 1.203 | -0.943 | 1.45 | dx | df  |
| Coleoptera | Polyphaga | Scolytidae    | <i>Pityophthorus pityographus</i> | 1.208 | -0.931 | 1.35 | dx | df  |
| Coleoptera | Polyphaga | Scolytidae    | <i>Crypturgus cinereus</i>        | 1.211 | -0.926 | 1.3  | dx | df  |
| Coleoptera | Polyphaga | Scolytidae    | <i>Pityophthorus exsculptus</i>   | 1.211 | -0.926 | 1.3  | dx | df  |
| Coleoptera | Polyphaga | Scolytidae    | <i>Crypturgus hispidulus</i>      | 1.214 | -0.920 | 1.25 | dx | df  |
| Coleoptera | Polyphaga | Scolytidae    | <i>Xyloterus domesticus</i>       | 1.737 | 0.127  | 3.45 | m  | df  |
| Coleoptera | Polyphaga | Scolytidae    | <i>Xyloterus lineatus</i>         | 1.750 | 0.157  | 3.2  | m  | df  |
| Coleoptera | Polyphaga | Scolytidae    | <i>Gnathotrichus materiarius</i>  | 1.761 | 0.181  | 3    | m  | df  |
| Coleoptera | Polyphaga | Scolytidae    | <i>Xyleborus monographus</i>      | 1.815 | 0.299  | 2    | m  | df  |
| Coleoptera | Polyphaga | Scolytidae    | <i>Xyleborus peregrinus</i>       | 1.815 | 0.299  | 2    | m  | df  |
| Coleoptera | Polyphaga | Scolytidae    | <i>Xyleborus dispar</i>           | 1.818 | 0.305  | 1.95 | m  | df  |
| Coleoptera | Polyphaga | Scolytidae    | <i>Xyleborus saxeseni</i>         | 1.826 | 0.323  | 1.8  | m  | df  |
| Coleoptera | Polyphaga | Scolytidae    | <i>Xyleborus germanus</i>         | 1.848 | 0.371  | 1.4  | m  | df  |

Feeding guilds: c = carnivore, d = decomposer (excl. wood), dx = decomposer-wood, h = herbivore (excl. xylophage), m = mycetophagous-fungi, mm = mycetophagous-mold

Habitat guilds: df = fresh dead wood, do = old dead wood, ds = specific dead wood structures at living trees, e = eurytop, g = ground dweller, rnf = rotten substrate/nests/fungi (excl. wood), v = vegetation, wf = wood fungi.

**Table A:** Multivariate fourth corner analyses [1] on the effects of Sampling solution, stratum, and forest type on species traits. We used the sequential test [2] as recommended in Dray et al. [3], using Holm correction of p-values (999 permutations). Significant value is marked in bold.

|                           | Statistic        | Sampling Solution | Stratum | Forest type |
|---------------------------|------------------|-------------------|---------|-------------|
| <b>Mean body size</b>     | F                | 30.316            | 45.452  | 144.514     |
| <b>Feeding guild</b>      | Chi <sup>2</sup> | 646.494           | 216.936 | 233.906     |
| <b>Habitat preference</b> | Chi <sup>2</sup> | <b>1151.755**</b> | 267.656 | 116.681     |

## References

1. Dray S, Legendre P (2008) Testing the species traits-environment relationships: the fourth-corner problem revisited. *Ecology* 89: 3400-3412.
2. ter Braak CJF, Cormont A, Dray S (2012) Improved testing of species traits–environment relationships in the fourth-corner problem. *Ecology* 93: 1525-1526.
3. Dray S, Choler P, Dolédec S, Peres-Neto PR, Thuiller W, Pavoine S, et al. (2013) Combining the fourth-corner and the RLQ methods for assessing trait responses to environmental variation. *Ecology* 95: 14-21.
