# Supplementary material for: Searching for the Optimal Sampling Solution: Variation in Invertebrate Communities, Sample Condition and DNA Quality
Source: PubMed Central journal article supplement (PMC4740435; doi:10.1371/journal.pone.0148247), 2016-02-03
Supplement: pone.0148247.s007.pdf [file pone.0148247.s007.pdf]

## Supplementary S7: Overview of sampled species

**Table A:** List of species including abundance sampled over seven weeks between May and July 2013, separated by forest type, stratum and top and bottom jars of flight-interception traps.

| Order      | Suborder  | Family        | SpeciesID                     | Beech forest |     | Spruce forest |     |             |     | Total |        |    |
|------------|-----------|---------------|-------------------------------|--------------|-----|---------------|-----|-------------|-----|-------|--------|----|
|            |           |               |                               | Understorey  |     | Canopy        |     | Understorey |     |       | Canopy |    |
|            |           |               |                               | Bottom       | Top | Bottom        | Top | Bottom      | Top |       |        |    |
| Coleoptera | Adephaga  | Carabidae     | <i>Amara ovata</i>            | 0            | 0   | 0             | 0   | 1           | 0   | 0     | 0      | 1  |
| Coleoptera | Adephaga  | Carabidae     | <i>Amara plebeja</i>          | 0            | 0   | 0             | 0   | 1           | 0   | 0     | 0      | 1  |
| Coleoptera | Adephaga  | Carabidae     | <i>Amara similata</i>         | 0            | 0   | 0             | 0   | 1           | 0   | 0     | 0      | 1  |
| Coleoptera | Adephaga  | Carabidae     | <i>Dromius agilis</i>         | 0            | 0   | 3             | 0   | 0           | 0   | 8     | 0      | 11 |
| Coleoptera | Adephaga  | Carabidae     | <i>Pterostichus vernalis</i>  | 0            | 0   | 0             | 0   | 1           | 0   | 0     | 0      | 1  |
| Coleoptera | Adephaga  | Dytiscidae    | <i>Hydroporus palustris</i>   | 0            | 0   | 0             | 0   | 1           | 0   | 0     | 0      | 1  |
| Coleoptera | Polyphaga | Alleculidae   | <i>Mycetochara humeralis</i>  | 0            | 0   | 2             | 0   | 0           | 0   | 0     | 0      | 2  |
| Coleoptera | Polyphaga | Anobiidae     | <i>Anobium emarginatum</i>    | 0            | 0   | 0             | 0   | 0           | 0   | 3     | 0      | 3  |
| Coleoptera | Polyphaga | Anobiidae     | <i>Anobium pertinax</i>       | 0            | 0   | 0             | 0   | 1           | 0   | 0     | 0      | 1  |
| Coleoptera | Polyphaga | Anobiidae     | <i>Anobium rufipenne</i>      | 4            | 0   | 21            | 1   | 0           | 0   | 0     | 0      | 26 |
| Coleoptera | Polyphaga | Anobiidae     | <i>Dryophilus pusillus</i>    | 0            | 0   | 0             | 0   | 3           | 0   | 7     | 0      | 10 |
| Coleoptera | Polyphaga | Anobiidae     | <i>Episernus granulatus</i>   | 0            | 0   | 0             | 0   | 0           | 0   | 1     | 0      | 1  |
| Coleoptera | Polyphaga | Anobiidae     | <i>Ernobius abietinus</i>     | 0            | 0   | 0             | 0   | 5           | 0   | 6     | 1      | 12 |
| Coleoptera | Polyphaga | Anobiidae     | <i>Ernobius abietis</i>       | 1            | 0   | 0             | 0   | 0           | 0   | 1     | 0      | 2  |
| Coleoptera | Polyphaga | Anobiidae     | <i>Hedobia imperialis</i>     | 5            | 0   | 4             | 0   | 0           | 0   | 1     | 0      | 10 |
| Coleoptera | Polyphaga | Anobiidae     | <i>Ptilinus pectinicornis</i> | 3            | 0   | 4             | 0   | 0           | 0   | 1     | 0      | 8  |
| Coleoptera | Polyphaga | Anobiidae     | <i>Xestobium plumbeum</i>     | 0            | 0   | 2             | 1   | 0           | 0   | 0     | 0      | 3  |
| Coleoptera | Polyphaga | Anthribidae   | <i>Anthribus albinus</i>      | 4            | 0   | 4             | 1   | 5           | 0   | 4     | 1      | 19 |
| Coleoptera | Polyphaga | Anthribidae   | <i>Brachytarsus nebulosus</i> | 0            | 0   | 0             | 0   | 3           | 2   | 4     | 0      | 9  |
| Coleoptera | Polyphaga | Bothrideridae | <i>Oxylaemus variolosus</i>   | 2            | 0   | 0             | 0   | 0           | 0   | 0     | 0      | 2  |
| Coleoptera | Polyphaga | Byturidae     | <i>Byturus ochraceus</i>      | 4            | 0   | 0             | 0   | 7           | 0   | 0     | 0      | 11 |

|            |           |               |                                |   |   |    |    |    |    |    |   |    |
|------------|-----------|---------------|--------------------------------|---|---|----|----|----|----|----|---|----|
| Coleoptera | Polyphaga | Byturidae     | <i>Byturus tomentosus</i>      | 5 | 0 | 12 | 0  | 43 | 1  | 20 | 0 | 81 |
| Coleoptera | Polyphaga | Cantharidae   | <i>Cantharis decipiens</i>     | 2 | 0 | 0  | 0  | 0  | 0  | 0  | 0 | 2  |
| Coleoptera | Polyphaga | Cantharidae   | <i>Cantharis nigricans</i>     | 0 | 1 | 1  | 1  | 3  | 2  | 3  | 1 | 12 |
| Coleoptera | Polyphaga | Cantharidae   | <i>Cantharis pellucida</i>     | 1 | 2 | 2  | 14 | 4  | 5  | 19 | 8 | 55 |
| Coleoptera | Polyphaga | Cantharidae   | <i>Malthinus frontalis</i>     | 0 | 0 | 2  | 0  | 2  | 0  | 1  | 0 | 5  |
| Coleoptera | Polyphaga | Cantharidae   | <i>Malthodes marginatus</i>    | 0 | 0 | 1  | 0  | 0  | 0  | 0  | 0 | 1  |
| Coleoptera | Polyphaga | Cantharidae   | <i>Malthodes pumilus</i>       | 2 | 1 | 3  | 1  | 6  | 2  | 2  | 0 | 17 |
| Coleoptera | Polyphaga | Cantharidae   | <i>Malthodes spathifer</i>     | 2 | 0 | 0  | 1  | 4  | 0  | 2  | 0 | 9  |
| Coleoptera | Polyphaga | Cantharidae   | <i>Metacantharis discoidea</i> | 0 | 0 | 0  | 0  | 1  | 20 | 4  | 4 | 29 |
| Coleoptera | Polyphaga | Cantharidae   | <i>Podabrus alpinus</i>        | 0 | 0 | 0  | 0  | 1  | 0  | 0  | 1 | 2  |
| Coleoptera | Polyphaga | Cantharidae   | <i>Rhagonycha atra</i>         | 0 | 0 | 0  | 0  | 2  | 3  | 1  | 0 | 6  |
| Coleoptera | Polyphaga | Cantharidae   | <i>Rhagonycha lignosa</i>      | 3 | 0 | 1  | 0  | 6  | 0  | 3  | 0 | 13 |
| Coleoptera | Polyphaga | Cantharidae   | <i>Rhagonycha testacea</i>     | 0 | 0 | 0  | 0  | 3  | 0  | 0  | 0 | 3  |
| Coleoptera | Polyphaga | Cantharidae   | <i>Rhagonycha translucida</i>  | 0 | 0 | 0  | 1  | 0  | 0  | 0  | 0 | 1  |
| Coleoptera | Polyphaga | Cerambycidae  | <i>Anaglyptus mysticus</i>     | 0 | 1 | 0  | 1  | 0  | 0  | 0  | 0 | 2  |
| Coleoptera | Polyphaga | Cerambycidae  | <i>Callidium aeneum</i>        | 0 | 0 | 0  | 0  | 0  | 0  | 2  | 1 | 3  |
| Coleoptera | Polyphaga | Cerambycidae  | <i>Clytus arietis</i>          | 0 | 1 | 0  | 0  | 0  | 0  | 0  | 0 | 1  |
| Coleoptera | Polyphaga | Cerambycidae  | <i>Clytus lama</i>             | 0 | 0 | 0  | 0  | 0  | 0  | 1  | 0 | 1  |
| Coleoptera | Polyphaga | Cerambycidae  | <i>Molorchus minor</i>         | 0 | 0 | 0  | 0  | 3  | 0  | 7  | 0 | 10 |
| Coleoptera | Polyphaga | Cerambycidae  | <i>Obrium brunneum</i>         | 0 | 0 | 0  | 0  | 0  | 0  | 2  | 0 | 2  |
| Coleoptera | Polyphaga | Cerambycidae  | <i>Oxymirus cursor</i>         | 0 | 0 | 0  | 0  | 3  | 1  | 0  | 0 | 4  |
| Coleoptera | Polyphaga | Cerambycidae  | <i>Pogonocherus decoratus</i>  | 0 | 0 | 0  | 0  | 0  | 0  | 1  | 0 | 1  |
| Coleoptera | Polyphaga | Cerambycidae  | <i>Rhagium inquisitor</i>      | 0 | 0 | 0  | 0  | 16 | 0  | 2  | 0 | 18 |
| Coleoptera | Polyphaga | Cerambycidae  | <i>Stenurella melanura</i>     | 0 | 0 | 0  | 0  | 1  | 0  | 0  | 0 | 1  |
| Coleoptera | Polyphaga | Cerambycidae  | <i>Tetropium castaneum</i>     | 0 | 0 | 0  | 0  | 7  | 0  | 0  | 0 | 7  |
| Coleoptera | Polyphaga | Cerylonidae   | <i>Cerylon ferrugineum</i>     | 1 | 0 | 0  | 0  | 1  | 0  | 1  | 0 | 3  |
| Coleoptera | Polyphaga | Cerylonidae   | <i>Cerylon histeroides</i>     | 2 | 1 | 0  | 0  | 2  | 0  | 0  | 0 | 5  |
| Coleoptera | Polyphaga | Cholevidae    | <i>Catops picipes</i>          | 1 | 0 | 0  | 0  | 0  | 0  | 0  | 0 | 1  |
| Coleoptera | Polyphaga | Cholevidae    | <i>Sciodrepoides watsoni</i>   | 7 | 0 | 0  | 0  | 1  | 0  | 0  | 0 | 8  |
| Coleoptera | Polyphaga | Chrysomelidae | <i>Longitarsus kutscherae</i>  | 0 | 0 | 0  | 0  | 0  | 1  | 0  | 0 | 1  |

|            |           |                |                                   |   |   |   |   |    |   |    |   |    |
|------------|-----------|----------------|-----------------------------------|---|---|---|---|----|---|----|---|----|
| Coleoptera | Polyphaga | Chrysomelidae  | <i>Oulema melanopus</i>           | 0 | 0 | 0 | 0 | 1  | 0 | 0  | 0 | 1  |
| Coleoptera | Polyphaga | Chrysomelidae  | <i>Phyllotreta vittula</i>        | 0 | 0 | 0 | 0 | 0  | 1 | 0  | 0 | 1  |
| Coleoptera | Polyphaga | Cimberidae     | <i>Cimberis attelaboides</i>      | 0 | 0 | 0 | 0 | 2  | 0 | 9  | 0 | 11 |
| Coleoptera | Polyphaga | Cisidae        | <i>Cis boleti</i>                 | 1 | 0 | 0 | 0 | 0  | 0 | 0  | 0 | 1  |
| Coleoptera | Polyphaga | Cisidae        | <i>Cis castaneus</i>              | 4 | 1 | 0 | 0 | 0  | 0 | 0  | 0 | 5  |
| Coleoptera | Polyphaga | Cisidae        | <i>Cis dentatus</i>               | 0 | 0 | 0 | 0 | 1  | 0 | 0  | 0 | 1  |
| Coleoptera | Polyphaga | Cisidae        | <i>Cis hispidus</i>               | 0 | 0 | 2 | 0 | 1  | 0 | 0  | 0 | 3  |
| Coleoptera | Polyphaga | Cisidae        | <i>Cis punctulatus</i>            | 0 | 0 | 0 | 0 | 4  | 0 | 0  | 0 | 4  |
| Coleoptera | Polyphaga | Cisidae        | <i>Ennearthron cornutum</i>       | 1 | 0 | 0 | 2 | 0  | 0 | 1  | 0 | 4  |
| Coleoptera | Polyphaga | Cisidae        | <i>Orthocis alni</i>              | 1 | 0 | 0 | 0 | 0  | 0 | 0  | 0 | 1  |
| Coleoptera | Polyphaga | Cisidae        | <i>Orthocis festivus</i>          | 1 | 0 | 0 | 0 | 0  | 0 | 0  | 0 | 1  |
| Coleoptera | Polyphaga | Cisidae        | <i>Orthocis pygmaeus</i>          | 1 | 0 | 0 | 0 | 2  | 0 | 0  | 0 | 3  |
| Coleoptera | Polyphaga | Cisidae        | <i>Orthocis vestitus</i>          | 2 | 2 | 0 | 0 | 2  | 0 | 0  | 0 | 6  |
| Coleoptera | Polyphaga | Clambidae      | <i>Clambus armadillo</i>          | 0 | 0 | 0 | 0 | 0  | 0 | 1  | 0 | 1  |
| Coleoptera | Polyphaga | Cleridae       | <i>Opilo mollis</i>               | 0 | 1 | 3 | 2 | 0  | 0 | 1  | 2 | 9  |
| Coleoptera | Polyphaga | Cleridae       | <i>Thanasimus formicarius</i>     | 1 | 0 | 0 | 0 | 5  | 6 | 1  | 0 | 13 |
| Coleoptera | Polyphaga | Cleridae       | <i>Thanasimus pectoralis</i>      | 0 | 0 | 0 | 0 | 0  | 0 | 1  | 0 | 1  |
| Coleoptera | Polyphaga | Coccinellidae  | <i>Adalia decempunctata</i>       | 0 | 0 | 0 | 0 | 0  | 1 | 1  | 0 | 2  |
| Coleoptera | Polyphaga | Coccinellidae  | <i>Anatis ocellata</i>            | 0 | 0 | 0 | 0 | 0  | 0 | 0  | 1 | 1  |
| Coleoptera | Polyphaga | Coccinellidae  | <i>Aphidecta oblitterata</i>      | 0 | 0 | 0 | 0 | 0  | 0 | 1  | 0 | 1  |
| Coleoptera | Polyphaga | Coccinellidae  | <i>Exochomus quadripustulatus</i> | 0 | 0 | 0 | 0 | 1  | 0 | 0  | 0 | 1  |
| Coleoptera | Polyphaga | Coccinellidae  | <i>Harmonia axyridis</i>          | 0 | 1 | 0 | 0 | 0  | 2 | 0  | 0 | 3  |
| Coleoptera | Polyphaga | Coccinellidae  | <i>Myzia oblongoguttata</i>       | 0 | 0 | 0 | 0 | 1  | 0 | 0  | 1 | 2  |
| Coleoptera | Polyphaga | Coccinellidae  | <i>Rhyzobius chrysomeloides</i>   | 0 | 0 | 0 | 0 | 1  | 1 | 0  | 0 | 2  |
| Coleoptera | Polyphaga | Coccinellidae  | <i>Scymnus abietis</i>            | 0 | 0 | 0 | 0 | 1  | 0 | 1  | 0 | 2  |
| Coleoptera | Polyphaga | Colydiidae     | <i>Synchita humeralis</i>         | 0 | 0 | 0 | 0 | 1  | 0 | 0  | 0 | 1  |
| Coleoptera | Polyphaga | Corylophidae   | <i>Orthoperus atomus</i>          | 0 | 0 | 0 | 0 | 10 | 1 | 21 | 0 | 32 |
| Coleoptera | Polyphaga | Corylophidae   | <i>Orthoperus mundus</i>          | 0 | 0 | 0 | 0 | 1  | 0 | 0  | 0 | 1  |
| Coleoptera | Polyphaga | Corylophidae   | <i>Sericoderus lateralis</i>      | 1 | 0 | 0 | 0 | 2  | 0 | 0  | 0 | 3  |
| Coleoptera | Polyphaga | Cryptophagidae | <i>Atomaria analis</i>            | 0 | 0 | 0 | 0 | 1  | 0 | 0  | 0 | 1  |

|            |           |                |                                   |    |   |   |   |    |    |    |   |    |
|------------|-----------|----------------|-----------------------------------|----|---|---|---|----|----|----|---|----|
| Coleoptera | Polyphaga | Cryptophagidae | <i>Atomaria atricapilla</i>       | 2  | 2 | 0 | 0 | 0  | 0  | 0  | 0 | 4  |
| Coleoptera | Polyphaga | Cryptophagidae | <i>Atomaria fuscata</i>           | 2  | 1 | 0 | 0 | 0  | 0  | 0  | 0 | 3  |
| Coleoptera | Polyphaga | Cryptophagidae | <i>Atomaria nigrirostris</i>      | 0  | 0 | 0 | 0 | 1  | 0  | 0  | 0 | 1  |
| Coleoptera | Polyphaga | Cryptophagidae | <i>Atomaria ornata</i>            | 0  | 0 | 0 | 0 | 7  | 0  | 0  | 0 | 7  |
| Coleoptera | Polyphaga | Cryptophagidae | <i>Atomaria procerula</i>         | 0  | 0 | 0 | 0 | 1  | 0  | 0  | 0 | 1  |
| Coleoptera | Polyphaga | Cryptophagidae | <i>Atomaria turgida</i>           | 0  | 0 | 0 | 0 | 32 | 0  | 0  | 0 | 32 |
| Coleoptera | Polyphaga | Cryptophagidae | <i>Cryptophagus dentatus</i>      | 2  | 0 | 0 | 0 | 0  | 0  | 2  | 0 | 4  |
| Coleoptera | Polyphaga | Cryptophagidae | <i>Cryptophagus distinguendus</i> | 1  | 0 | 0 | 0 | 1  | 0  | 0  | 0 | 2  |
| Coleoptera | Polyphaga | Cryptophagidae | <i>Cryptophagus dorsalis</i>      | 0  | 0 | 0 | 0 | 0  | 0  | 2  | 0 | 2  |
| Coleoptera | Polyphaga | Cryptophagidae | <i>Cryptophagus pilosus</i>       | 1  | 0 | 0 | 0 | 2  | 0  | 0  | 0 | 3  |
| Coleoptera | Polyphaga | Cryptophagidae | <i>Cryptophagus pubescens</i>     | 2  | 0 | 2 | 0 | 1  | 0  | 0  | 0 | 5  |
| Coleoptera | Polyphaga | Cryptophagidae | <i>Cryptophagus scanicus</i>      | 1  | 0 | 0 | 0 | 0  | 0  | 0  | 0 | 1  |
| Coleoptera | Polyphaga | Cryptophagidae | <i>Cryptophagus thomsoni</i>      | 1  | 0 | 0 | 0 | 0  | 0  | 0  | 0 | 1  |
| Coleoptera | Polyphaga | Cryptophagidae | <i>Micrambe abietis</i>           | 0  | 0 | 0 | 0 | 16 | 1  | 11 | 0 | 28 |
| Coleoptera | Polyphaga | Curculionidae  | <i>Anthonomus phyllocola</i>      | 0  | 0 | 0 | 0 | 0  | 0  | 1  | 0 | 1  |
| Coleoptera | Polyphaga | Curculionidae  | <i>Barypeithes pellucidus</i>     | 28 | 0 | 0 | 0 | 0  | 0  | 0  | 0 | 28 |
| Coleoptera | Polyphaga | Curculionidae  | <i>Cossonus cylindricus</i>       | 0  | 0 | 1 | 0 | 0  | 0  | 0  | 0 | 1  |
| Coleoptera | Polyphaga | Curculionidae  | <i>Curculio glandium</i>          | 0  | 2 | 1 | 1 | 0  | 0  | 0  | 0 | 4  |
| Coleoptera | Polyphaga | Curculionidae  | <i>Curculio pellitus</i>          | 0  | 1 | 0 | 0 | 0  | 0  | 0  | 0 | 1  |
| Coleoptera | Polyphaga | Curculionidae  | <i>Curculio venosus</i>           | 0  | 1 | 0 | 0 | 0  | 0  | 0  | 0 | 1  |
| Coleoptera | Polyphaga | Curculionidae  | <i>Hylobius abietis</i>           | 0  | 0 | 0 | 0 | 0  | 0  | 4  | 0 | 4  |
| Coleoptera | Polyphaga | Curculionidae  | <i>Hypera nigrirostris</i>        | 0  | 0 | 0 | 0 | 1  | 0  | 0  | 0 | 1  |
| Coleoptera | Polyphaga | Curculionidae  | <i>Magdalis phlegmatica</i>       | 0  | 0 | 0 | 0 | 1  | 0  | 0  | 0 | 1  |
| Coleoptera | Polyphaga | Curculionidae  | <i>Otiorhynchus scaber</i>        | 0  | 0 | 0 | 0 | 2  | 0  | 1  | 0 | 3  |
| Coleoptera | Polyphaga | Curculionidae  | <i>Otiorhynchus singularis</i>    | 0  | 0 | 0 | 0 | 5  | 0  | 0  | 0 | 5  |
| Coleoptera | Polyphaga | Curculionidae  | <i>Phyllobius arborator</i>       | 0  | 0 | 0 | 0 | 2  | 1  | 0  | 0 | 3  |
| Coleoptera | Polyphaga | Curculionidae  | <i>Phyllobius argentatus</i>      | 6  | 0 | 4 | 0 | 0  | 1  | 0  | 0 | 11 |
| Coleoptera | Polyphaga | Curculionidae  | <i>Phyllobius pomaceus</i>        | 1  | 0 | 0 | 0 | 0  | 0  | 0  | 0 | 1  |
| Coleoptera | Polyphaga | Curculionidae  | <i>Pissodes pini</i>              | 0  | 0 | 0 | 0 | 0  | 1  | 0  | 0 | 1  |
| Coleoptera | Polyphaga | Curculionidae  | <i>Polydrusus impar</i>           | 0  | 0 | 0 | 0 | 8  | 15 | 9  | 3 | 35 |

|            |           |               |                                  |     |    |     |   |     |   |     |   |     |
|------------|-----------|---------------|----------------------------------|-----|----|-----|---|-----|---|-----|---|-----|
| Coleoptera | Polyphaga | Curculionidae | <i>Polydrusus undatus</i>        | 5   | 5  | 6   | 4 | 0   | 0 | 1   | 1 | 22  |
| Coleoptera | Polyphaga | Curculionidae | <i>Rhinomias forticornis</i>     | 0   | 0  | 0   | 0 | 1   | 0 | 0   | 0 | 1   |
| Coleoptera | Polyphaga | Curculionidae | <i>Rhynchaenus fagi</i>          | 146 | 14 | 175 | 8 | 8   | 4 | 13  | 0 | 368 |
| Coleoptera | Polyphaga | Curculionidae | <i>Rhynchaenus quercus</i>       | 0   | 0  | 0   | 0 | 1   | 0 | 3   | 0 | 4   |
| Coleoptera | Polyphaga | Curculionidae | <i>Rhyncolus ater</i>            | 0   | 0  | 0   | 0 | 1   | 0 | 0   | 0 | 1   |
| Coleoptera | Polyphaga | Curculionidae | <i>Stereonychus fraxini</i>      | 0   | 0  | 1   | 0 | 0   | 0 | 0   | 0 | 1   |
| Coleoptera | Polyphaga | Curculionidae | <i>Strophosoma melanogrammum</i> | 8   | 0  | 3   | 0 | 11  | 0 | 0   | 0 | 22  |
| Coleoptera | Polyphaga | Dermestidae   | <i>Globicornis nigripes</i>      | 0   | 0  | 1   | 0 | 0   | 0 | 0   | 0 | 1   |
| Coleoptera | Polyphaga | Dermestidae   | <i>Megatoma undata</i>           | 0   | 0  | 3   | 0 | 3   | 0 | 4   | 1 | 11  |
| Coleoptera | Polyphaga | Elateridae    | <i>Agriotes acuminatus</i>       | 6   | 0  | 1   | 0 | 63  | 0 | 5   | 0 | 75  |
| Coleoptera | Polyphaga | Elateridae    | <i>Agriotes pallidulus</i>       | 0   | 0  | 2   | 0 | 0   | 0 | 0   | 0 | 2   |
| Coleoptera | Polyphaga | Elateridae    | <i>Agriotes pilosellus</i>       | 7   | 0  | 0   | 0 | 1   | 0 | 0   | 0 | 8   |
| Coleoptera | Polyphaga | Elateridae    | <i>Ampedus erythrogonus</i>      | 0   | 0  | 0   | 0 | 2   | 0 | 6   | 0 | 8   |
| Coleoptera | Polyphaga | Elateridae    | <i>Ampedus nigrinus</i>          | 0   | 0  | 0   | 0 | 2   | 0 | 5   | 0 | 7   |
| Coleoptera | Polyphaga | Elateridae    | <i>Ampedus pomorum</i>           | 1   | 0  | 1   | 0 | 0   | 0 | 1   | 0 | 3   |
| Coleoptera | Polyphaga | Elateridae    | <i>Ampedus sanguineus</i>        | 0   | 0  | 1   | 0 | 0   | 0 | 0   | 0 | 1   |
| Coleoptera | Polyphaga | Elateridae    | <i>Anostirus purpureus</i>       | 0   | 0  | 0   | 0 | 1   | 0 | 0   | 0 | 1   |
| Coleoptera | Polyphaga | Elateridae    | <i>Athous haemorrhoidalis</i>    | 0   | 0  | 0   | 0 | 1   | 0 | 0   | 0 | 1   |
| Coleoptera | Polyphaga | Elateridae    | <i>Athous subfuscus</i>          | 94  | 1  | 45  | 1 | 302 | 1 | 165 | 2 | 611 |
| Coleoptera | Polyphaga | Elateridae    | <i>Athous vittatus</i>           | 46  | 1  | 43  | 1 | 12  | 0 | 5   | 0 | 108 |
| Coleoptera | Polyphaga | Elateridae    | <i>Calambus bipustulatus</i>     | 0   | 0  | 3   | 0 | 0   | 0 | 0   | 0 | 3   |
| Coleoptera | Polyphaga | Elateridae    | <i>Dalopius marginatus</i>       | 18  | 0  | 22  | 3 | 153 | 1 | 116 | 0 | 313 |
| Coleoptera | Polyphaga | Elateridae    | <i>Denticollis linearis</i>      | 12  | 0  | 1   | 0 | 2   | 0 | 0   | 0 | 15  |
| Coleoptera | Polyphaga | Elateridae    | <i>Kibunea minutus</i>           | 0   | 0  | 0   | 0 | 0   | 0 | 1   | 0 | 1   |
| Coleoptera | Polyphaga | Elateridae    | <i>Melanotus castanipes</i>      | 2   | 0  | 0   | 0 | 21  | 0 | 5   | 0 | 28  |
| Coleoptera | Polyphaga | Elateridae    | <i>Melanotus rufipes</i>         | 5   | 0  | 1   | 0 | 8   | 0 | 4   | 0 | 18  |
| Coleoptera | Polyphaga | Elateridae    | <i>Sericus brunneus</i>          | 0   | 0  | 0   | 0 | 0   | 0 | 1   | 0 | 1   |
| Coleoptera | Polyphaga | Endomychidae  | <i>Symbiotes gibberosus</i>      | 0   | 0  | 1   | 0 | 0   | 0 | 0   | 0 | 1   |
| Coleoptera | Polyphaga | Endomychidae  | <i>Symbiotes latus</i>           | 0   | 0  | 0   | 1 | 1   | 0 | 0   | 0 | 2   |
| Coleoptera | Polyphaga | Erotylidae    | <i>Tritoma bipustulata</i>       | 0   | 0  | 0   | 0 | 2   | 0 | 1   | 0 | 3   |

|            |           |                |                                    |    |   |    |   |     |   |    |   |     |
|------------|-----------|----------------|------------------------------------|----|---|----|---|-----|---|----|---|-----|
| Coleoptera | Polyphaga | Eucnemidae     | <i>Eucnemis capucina</i>           | 0  | 0 | 1  | 0 | 0   | 0 | 0  | 0 | 1   |
| Coleoptera | Polyphaga | Geotrupidae    | <i>Anoplotrupes stercorosus</i>    | 0  | 0 | 0  | 0 | 2   | 0 | 0  | 0 | 2   |
| Coleoptera | Polyphaga | Histeridae     | <i>Gnathoncus buyssoni</i>         | 0  | 0 | 2  | 0 | 0   | 0 | 0  | 0 | 2   |
| Coleoptera | Polyphaga | Histeridae     | <i>Margarinotus striola</i>        | 1  | 0 | 0  | 0 | 1   | 0 | 0  | 0 | 2   |
| Coleoptera | Polyphaga | Histeridae     | <i>Paromalus flavicornis</i>       | 2  | 0 | 0  | 0 | 0   | 0 | 0  | 0 | 2   |
| Coleoptera | Polyphaga | Hydrophilidae  | <i>Megasternum obscurum</i>        | 0  | 0 | 0  | 0 | 2   | 0 | 0  | 0 | 2   |
| Coleoptera | Polyphaga | Laemophloeidae | <i>Leptophloeus alternans</i>      | 0  | 0 | 0  | 0 | 0   | 0 | 2  | 0 | 2   |
| Coleoptera | Polyphaga | Latridiidae    | <i>Cartodere constricta</i>        | 0  | 0 | 0  | 0 | 8   | 0 | 0  | 0 | 8   |
| Coleoptera | Polyphaga | Latridiidae    | <i>Cartodere nodifer</i>           | 3  | 1 | 0  | 0 | 1   | 0 | 0  | 0 | 5   |
| Coleoptera | Polyphaga | Latridiidae    | <i>Corticaria abietorum</i>        | 1  | 0 | 0  | 0 | 7   | 0 | 24 | 0 | 32  |
| Coleoptera | Polyphaga | Latridiidae    | <i>Corticarina fuscula</i>         | 0  | 0 | 0  | 0 | 1   | 0 | 0  | 0 | 1   |
| Coleoptera | Polyphaga | Latridiidae    | <i>Corticarina lambiana</i>        | 0  | 0 | 0  | 0 | 37  | 3 | 37 | 0 | 77  |
| Coleoptera | Polyphaga | Latridiidae    | <i>Corticarina similata</i>        | 1  | 2 | 3  | 1 | 5   | 1 | 24 | 5 | 42  |
| Coleoptera | Polyphaga | Latridiidae    | <i>Corticinara gibbosa</i>         | 9  | 3 | 13 | 9 | 7   | 2 | 7  | 0 | 50  |
| Coleoptera | Polyphaga | Latridiidae    | <i>Dienerella clathrata</i>        | 0  | 0 | 0  | 0 | 1   | 0 | 0  | 0 | 1   |
| Coleoptera | Polyphaga | Latridiidae    | <i>Enicmus histrio</i>             | 1  | 0 | 0  | 0 | 0   | 0 | 0  | 0 | 1   |
| Coleoptera | Polyphaga | Latridiidae    | <i>Enicmus transversus</i>         | 0  | 0 | 0  | 0 | 1   | 0 | 0  | 0 | 1   |
| Coleoptera | Polyphaga | Latridiidae    | <i>Latridius anthracinus</i>       | 0  | 0 | 0  | 0 | 1   | 0 | 0  | 0 | 1   |
| Coleoptera | Polyphaga | Latridiidae    | <i>Latridius hirtus</i>            | 0  | 0 | 1  | 0 | 0   | 0 | 0  | 0 | 1   |
| Coleoptera | Polyphaga | Latridiidae    | <i>Stephostethus alternans</i>     | 4  | 0 | 0  | 0 | 1   | 0 | 0  | 0 | 5   |
| Coleoptera | Polyphaga | Latridiidae    | <i>Stephostethus angusticollis</i> | 2  | 0 | 0  | 0 | 2   | 0 | 0  | 0 | 4   |
| Coleoptera | Polyphaga | Latridiidae    | <i>Stephostethus rugicollis</i>    | 0  | 0 | 0  | 0 | 5   | 0 | 0  | 0 | 5   |
| Coleoptera | Polyphaga | Leiodidae      | <i>Agathidium seminulum</i>        | 3  | 0 | 1  | 0 | 44  | 0 | 0  | 0 | 48  |
| Coleoptera | Polyphaga | Leiodidae      | <i>Agathidium varians</i>          | 1  | 0 | 0  | 0 | 0   | 0 | 0  | 0 | 1   |
| Coleoptera | Polyphaga | Leiodidae      | <i>Anisotoma orbicularis</i>       | 0  | 0 | 0  | 0 | 1   | 0 | 0  | 0 | 1   |
| Coleoptera | Polyphaga | Lycidae        | <i>Dictyoapterus aurora</i>        | 0  | 0 | 0  | 0 | 3   | 0 | 0  | 0 | 3   |
| Coleoptera | Polyphaga | Lymexylonidae  | <i>Hylecoetus dermestoides</i>     | 32 | 0 | 0  | 0 | 114 | 0 | 0  | 0 | 146 |
| Coleoptera | Polyphaga | Malachidae     | <i>Anthocomus fasciatus</i>        | 0  | 0 | 1  | 0 | 0   | 0 | 0  | 0 | 1   |
| Coleoptera | Polyphaga | Melyridae      | <i>Aplocnemus nigricornis</i>      | 0  | 0 | 0  | 1 | 0   | 0 | 2  | 0 | 3   |
| Coleoptera | Polyphaga | Melyridae      | <i>Dasytes aeratus</i>             | 0  | 0 | 1  | 0 | 0   | 0 | 0  | 0 | 1   |

|            |           |                |                                       |   |   |   |   |    |   |    |   |    |
|------------|-----------|----------------|---------------------------------------|---|---|---|---|----|---|----|---|----|
| Coleoptera | Polyphaga | Melyridae      | <i>Dasytes caeruleus</i>              | 5 | 0 | 5 | 0 | 8  | 0 | 11 | 0 | 29 |
| Coleoptera | Polyphaga | Melyridae      | <i>Dasytes plumbeus</i>               | 0 | 0 | 0 | 0 | 4  | 0 | 0  | 0 | 4  |
| Coleoptera | Polyphaga | Mordellidae    | <i>Mordellochroa abdominalis</i>      | 0 | 0 | 1 | 0 | 0  | 0 | 0  | 0 | 1  |
| Coleoptera | Polyphaga | Mordellidae    | <i>Tomoxia bucephala</i>              | 0 | 0 | 1 | 0 | 0  | 0 | 0  | 0 | 1  |
| Coleoptera | Polyphaga | Mycetophagidae | <i>Litargus connexus</i>              | 3 | 0 | 8 | 0 | 5  | 0 | 3  | 0 | 19 |
| Coleoptera | Polyphaga | Mycetophagidae | <i>Mycetophagus atomarius</i>         | 1 | 0 | 0 | 0 | 1  | 0 | 0  | 0 | 2  |
| Coleoptera | Polyphaga | Mycetophagidae | <i>Mycetophagus piceus</i>            | 5 | 0 | 0 | 0 | 0  | 0 | 0  | 0 | 5  |
| Coleoptera | Polyphaga | Mycetophagidae | <i>Mycetophagus quadriguttatus</i>    | 0 | 1 | 0 | 0 | 0  | 0 | 0  | 0 | 1  |
| Coleoptera | Polyphaga | Mycetophagidae | <i>Mycetophagus quadripustulatus</i>  | 4 | 0 | 0 | 0 | 0  | 0 | 0  | 0 | 4  |
| Coleoptera | Polyphaga | Nitidulidae    | <i>Cryptarcha undata</i>              | 0 | 0 | 4 | 7 | 0  | 0 | 0  | 0 | 11 |
| Coleoptera | Polyphaga | Nitidulidae    | <i>Cychramus luteus</i>               | 0 | 0 | 0 | 0 | 2  | 0 | 0  | 0 | 2  |
| Coleoptera | Polyphaga | Nitidulidae    | <i>Cychramus variegatus</i>           | 5 | 1 | 2 | 0 | 50 | 6 | 32 | 0 | 96 |
| Coleoptera | Polyphaga | Nitidulidae    | <i>Eपुरaea marseuli</i>               | 0 | 0 | 0 | 0 | 2  | 0 | 0  | 0 | 2  |
| Coleoptera | Polyphaga | Nitidulidae    | <i>Eपुरaea melanocephala</i>          | 2 | 0 | 0 | 0 | 1  | 0 | 4  | 0 | 7  |
| Coleoptera | Polyphaga | Nitidulidae    | <i>Eपुरaea pygmaea</i>                | 0 | 0 | 0 | 0 | 27 | 0 | 0  | 0 | 27 |
| Coleoptera | Polyphaga | Nitidulidae    | <i>Eपुरaea unicolor</i>               | 0 | 0 | 0 | 0 | 4  | 0 | 0  | 0 | 4  |
| Coleoptera | Polyphaga | Nitidulidae    | <i>Glischrochilus quadripunctatus</i> | 0 | 0 | 0 | 0 | 1  | 0 | 0  | 0 | 1  |
| Coleoptera | Polyphaga | Nitidulidae    | <i>Glischrochilus quadrisignatus</i>  | 0 | 0 | 0 | 0 | 0  | 0 | 1  | 0 | 1  |
| Coleoptera | Polyphaga | Nitidulidae    | <i>Meligethes aeneus</i>              | 1 | 0 | 1 | 0 | 0  | 0 | 0  | 1 | 3  |
| Coleoptera | Polyphaga | Nitidulidae    | <i>Meligethes denticulatus</i>        | 0 | 0 | 0 | 0 | 3  | 0 | 0  | 0 | 3  |
| Coleoptera | Polyphaga | Nitidulidae    | <i>Meligethes nigrescens</i>          | 0 | 0 | 0 | 0 | 1  | 0 | 0  | 0 | 1  |
| Coleoptera | Polyphaga | Nitidulidae    | <i>Meligethes pedicularius</i>        | 0 | 0 | 0 | 0 | 2  | 0 | 0  | 0 | 2  |
| Coleoptera | Polyphaga | Nitidulidae    | <i>Pityophagus ferrugineus</i>        | 0 | 0 | 0 | 0 | 2  | 0 | 0  | 0 | 2  |
| Coleoptera | Polyphaga | Omalisidae     | <i>Omalisus fontisbellaquaei</i>      | 0 | 0 | 0 | 0 | 1  | 0 | 0  | 0 | 1  |
| Coleoptera | Polyphaga | Pselaphidae    | <i>Bibloporus bicolor</i>             | 1 | 0 | 0 | 0 | 4  | 0 | 1  | 0 | 6  |
| Coleoptera | Polyphaga | Pselaphidae    | <i>Bibloporus minutus</i>             | 0 | 0 | 1 | 0 | 1  | 1 | 0  | 0 | 3  |
| Coleoptera | Polyphaga | Pselaphidae    | <i>Brachygluta sinuata</i>            | 0 | 0 | 0 | 0 | 1  | 0 | 0  | 0 | 1  |
| Coleoptera | Polyphaga | Pselaphidae    | <i>Bryaxis curtisii</i>               | 0 | 0 | 0 | 0 | 1  | 0 | 0  | 0 | 1  |
| Coleoptera | Polyphaga | Pselaphidae    | <i>Bryaxis nodicornis</i>             | 0 | 0 | 0 | 0 | 1  | 0 | 0  | 0 | 1  |
| Coleoptera | Polyphaga | Pselaphidae    | <i>Bryaxis puncticollis</i>           | 1 | 0 | 0 | 0 | 0  | 0 | 0  | 0 | 1  |

|            |           |               |                                 |    |   |   |   |    |   |   |   |    |
|------------|-----------|---------------|---------------------------------|----|---|---|---|----|---|---|---|----|
| Coleoptera | Polyphaga | Pselaphidae   | <i>Bythinus burrelli</i>        | 1  | 0 | 1 | 0 | 2  | 0 | 1 | 0 | 5  |
| Coleoptera | Polyphaga | Pselaphidae   | <i>Bythinus macropalpus</i>     | 0  | 0 | 0 | 0 | 1  | 0 | 0 | 0 | 1  |
| Coleoptera | Polyphaga | Pselaphidae   | <i>Euplectus bescidicus</i>     | 5  | 0 | 0 | 0 | 0  | 0 | 0 | 0 | 5  |
| Coleoptera | Polyphaga | Pselaphidae   | <i>Euplectus karsteni</i>       | 0  | 0 | 0 | 0 | 0  | 1 | 0 | 0 | 1  |
| Coleoptera | Polyphaga | Pselaphidae   | <i>Euplectus punctatus</i>      | 0  | 0 | 0 | 0 | 3  | 0 | 0 | 0 | 3  |
| Coleoptera | Polyphaga | Pselaphidae   | <i>Plectophloeus fischeri</i>   | 22 | 0 | 2 | 0 | 45 | 1 | 2 | 0 | 72 |
| Coleoptera | Polyphaga | Pselaphidae   | <i>Trichonyx sulcicollis</i>    | 1  | 0 | 0 | 0 | 0  | 0 | 0 | 0 | 1  |
| Coleoptera | Polyphaga | Pselaphidae   | <i>Trimium brevicorne</i>       | 0  | 0 | 1 | 0 | 0  | 0 | 0 | 0 | 1  |
| Coleoptera | Polyphaga | Ptiliidae     | <i>Acrotrichis grandicollis</i> | 0  | 0 | 1 | 0 | 0  | 0 | 0 | 0 | 1  |
| Coleoptera | Polyphaga | Ptiliidae     | <i>Acrotrichis insularis</i>    | 0  | 0 | 0 | 0 | 1  | 0 | 0 | 0 | 1  |
| Coleoptera | Polyphaga | Ptiliidae     | <i>Acrotrichis intermedia</i>   | 4  | 0 | 0 | 0 | 7  | 0 | 0 | 0 | 11 |
| Coleoptera | Polyphaga | Ptiliidae     | <i>Baeocrara variolosa</i>      | 3  | 0 | 0 | 0 | 0  | 0 | 0 | 0 | 3  |
| Coleoptera | Polyphaga | Ptiliidae     | <i>Ptenidium laevigatum</i>     | 0  | 0 | 0 | 0 | 1  | 0 | 0 | 0 | 1  |
| Coleoptera | Polyphaga | Ptiliidae     | <i>Pteryx suturalis</i>         | 0  | 0 | 0 | 0 | 0  | 1 | 0 | 0 | 1  |
| Coleoptera | Polyphaga | Ptinidae      | <i>Ptinus subpilosus</i>        | 0  | 0 | 0 | 0 | 1  | 0 | 1 | 0 | 2  |
| Coleoptera | Polyphaga | Pyrochroidae  | <i>Schizotus pectinicornis</i>  | 0  | 0 | 1 | 0 | 0  | 0 | 0 | 0 | 1  |
| Coleoptera | Polyphaga | Rhizophagidae | <i>Monotoma longicollis</i>     | 0  | 0 | 0 | 0 | 1  | 0 | 0 | 0 | 1  |
| Coleoptera | Polyphaga | Rhizophagidae | <i>Rhizophagus bipustulatus</i> | 2  | 0 | 0 | 0 | 4  | 0 | 0 | 0 | 6  |
| Coleoptera | Polyphaga | Rhizophagidae | <i>Rhizophagus depressus</i>    | 0  | 0 | 0 | 0 | 4  | 0 | 0 | 0 | 4  |
| Coleoptera | Polyphaga | Rhizophagidae | <i>Rhizophagus dispar</i>       | 5  | 0 | 0 | 0 | 1  | 0 | 0 | 0 | 6  |
| Coleoptera | Polyphaga | Rhizophagidae | <i>Rhizophagus ferrugineus</i>  | 0  | 0 | 0 | 0 | 6  | 0 | 0 | 0 | 6  |
| Coleoptera | Polyphaga | Rhizophagidae | <i>Rhizophagus nitidulus</i>    | 0  | 0 | 0 | 0 | 1  | 0 | 0 | 0 | 1  |
| Coleoptera | Polyphaga | Rhizophagidae | <i>Rhizophagus perforatus</i>   | 12 | 0 | 0 | 1 | 8  | 0 | 0 | 0 | 21 |
| Coleoptera | Polyphaga | Rhynchitidae  | <i>Caenorhinus germanicus</i>   | 0  | 0 | 0 | 0 | 2  | 0 | 0 | 0 | 2  |
| Coleoptera | Polyphaga | Salpingidae   | <i>Salpingus planirostris</i>   | 9  | 1 | 9 | 0 | 3  | 0 | 0 | 0 | 22 |
| Coleoptera | Polyphaga | Salpingidae   | <i>Salpingus ruficollis</i>     | 1  | 0 | 3 | 0 | 6  | 0 | 0 | 0 | 10 |
| Coleoptera | Polyphaga | Salpingidae   | <i>Vincenzellus ruficollis</i>  | 1  | 0 | 0 | 0 | 0  | 0 | 1 | 0 | 2  |
| Coleoptera | Polyphaga | Scarabaeidae  | <i>Aphodius constans</i>        | 1  | 0 | 0 | 0 | 2  | 0 | 0 | 0 | 3  |
| Coleoptera | Polyphaga | Scirtidae     | <i>Cyphon coarctatus</i>        | 1  | 0 | 0 | 0 | 1  | 0 | 0 | 0 | 2  |
| Coleoptera | Polyphaga | Scolytidae    | <i>Cryphalus piceae</i>         | 0  | 0 | 1 | 0 | 0  | 0 | 0 | 0 | 1  |



|            |           |              |                                   |     |   |    |   |     |   |    |   |     |
|------------|-----------|--------------|-----------------------------------|-----|---|----|---|-----|---|----|---|-----|
| Coleoptera | Polyphaga | Scolytidae   | <i>Crypturgus cinereus</i>        | 2   | 0 | 0  | 0 | 10  | 0 | 1  | 0 | 13  |
| Coleoptera | Polyphaga | Scolytidae   | <i>Crypturgus hispidulus</i>      | 0   | 0 | 0  | 0 | 10  | 0 | 0  | 0 | 10  |
| Coleoptera | Polyphaga | Scolytidae   | <i>Dryocoetes autographus</i>     | 1   | 0 | 0  | 0 | 104 | 0 | 3  | 0 | 108 |
| Coleoptera | Polyphaga | Scolytidae   | <i>Dryocoetes villosus</i>        | 5   | 1 | 0  | 0 | 1   | 0 | 0  | 0 | 7   |
| Coleoptera | Polyphaga | Scolytidae   | <i>Ernoporicus fagi</i>           | 2   | 0 | 28 | 1 | 2   | 0 | 0  | 0 | 33  |
| Coleoptera | Polyphaga | Scolytidae   | <i>Gnathotrichus materiarius</i>  | 0   | 0 | 0  | 0 | 1   | 0 | 0  | 0 | 1   |
| Coleoptera | Polyphaga | Scolytidae   | <i>Hylastes cunicularius</i>      | 1   | 0 | 0  | 0 | 83  | 0 | 1  | 0 | 85  |
| Coleoptera | Polyphaga | Scolytidae   | <i>Hylurgops palliatus</i>        | 0   | 0 | 0  | 0 | 6   | 0 | 0  | 0 | 6   |
| Coleoptera | Polyphaga | Scolytidae   | <i>Ips typographus</i>            | 0   | 0 | 1  | 0 | 15  | 0 | 1  | 0 | 17  |
| Coleoptera | Polyphaga | Scolytidae   | <i>Leperisinus fraxini</i>        | 0   | 0 | 3  | 0 | 0   | 0 | 0  | 0 | 3   |
| Coleoptera | Polyphaga | Scolytidae   | <i>Pityogenes chalcographus</i>   | 0   | 0 | 0  | 0 | 25  | 0 | 6  | 0 | 31  |
| Coleoptera | Polyphaga | Scolytidae   | <i>Pityophthorus exsculptus</i>   | 0   | 0 | 0  | 0 | 0   | 0 | 9  | 0 | 9   |
| Coleoptera | Polyphaga | Scolytidae   | <i>Pityophthorus pityographus</i> | 0   | 0 | 0  | 0 | 8   | 0 | 17 | 0 | 25  |
| Coleoptera | Polyphaga | Scolytidae   | <i>Polygraphus poligraphus</i>    | 0   | 0 | 0  | 0 | 0   | 0 | 1  | 0 | 1   |
| Coleoptera | Polyphaga | Scolytidae   | <i>Scolytus intricatus</i>        | 0   | 0 | 0  | 0 | 0   | 0 | 2  | 0 | 2   |
| Coleoptera | Polyphaga | Scolytidae   | <i>Taphrorychus bicolor</i>       | 0   | 0 | 5  | 3 | 1   | 0 | 0  | 0 | 9   |
| Coleoptera | Polyphaga | Scolytidae   | <i>Xyleborus dispar</i>           | 7   | 0 | 3  | 0 | 30  | 3 | 1  | 0 | 44  |
| Coleoptera | Polyphaga | Scolytidae   | <i>Xyleborus germanus</i>         | 420 | 3 | 1  | 0 | 226 | 1 | 0  | 0 | 651 |
| Coleoptera | Polyphaga | Scolytidae   | <i>Xyleborus monographus</i>      | 0   | 0 | 1  | 0 | 0   | 0 | 0  | 0 | 1   |
| Coleoptera | Polyphaga | Scolytidae   | <i>Xyleborus peregrinus</i>       | 0   | 0 | 37 | 2 | 3   | 0 | 3  | 0 | 45  |
| Coleoptera | Polyphaga | Scolytidae   | <i>Xyleborus saxeseni</i>         | 4   | 1 | 28 | 2 | 20  | 0 | 7  | 0 | 62  |
| Coleoptera | Polyphaga | Scolytidae   | <i>Xyloterus domesticus</i>       | 3   | 0 | 0  | 0 | 1   | 0 | 0  | 0 | 4   |
| Coleoptera | Polyphaga | Scolytidae   | <i>Xyloterus lineatus</i>         | 0   | 0 | 0  | 0 | 4   | 0 | 0  | 0 | 4   |
| Coleoptera | Polyphaga | Scraptiidae  | <i>Anaspis frontalis</i>          | 0   | 0 | 0  | 0 | 1   | 1 | 0  | 0 | 2   |
| Coleoptera | Polyphaga | Scraptiidae  | <i>Anaspis ruficollis</i>         | 0   | 0 | 0  | 0 | 1   | 0 | 0  | 0 | 1   |
| Coleoptera | Polyphaga | Scraptiidae  | <i>Anaspis rufilabris</i>         | 0   | 0 | 0  | 0 | 2   | 0 | 5  | 0 | 7   |
| Coleoptera | Polyphaga | Scraptiidae  | <i>Anaspis thoracica</i>          | 2   | 0 | 1  | 0 | 1   | 1 | 2  | 0 | 7   |
| Coleoptera | Polyphaga | Scydmaenidae | <i>Neuraphes elongatulus</i>      | 1   | 0 | 1  | 0 | 0   | 0 | 0  | 0 | 2   |
| Coleoptera | Polyphaga | Silphidae    | <i>Oiceoptoma thoracica</i>       | 1   | 0 | 0  | 0 | 0   | 0 | 0  | 0 | 1   |
| Coleoptera | Polyphaga | Silvanidae   | <i>Silvanoprus fagi</i>           | 0   | 0 | 0  | 0 | 13  | 0 | 1  | 0 | 14  |

|            |           |               |                                   |     |    |   |    |     |     |   |   |     |
|------------|-----------|---------------|-----------------------------------|-----|----|---|----|-----|-----|---|---|-----|
| Coleoptera | Polyphaga | Silvanidae    | <i>Uleiota planata</i>            | 0   | 0  | 0 | 0  | 2   | 0   | 0 | 0 | 2   |
| Coleoptera | Polyphaga | Staphylinidae | <i>Aleochara bipustulata</i>      | 1   | 0  | 1 | 0  | 0   | 0   | 0 | 0 | 2   |
| Coleoptera | Polyphaga | Staphylinidae | <i>Aleocharinae spec.</i>         | 0   | 0  | 0 | 0  | 1   | 0   | 0 | 0 | 1   |
| Coleoptera | Polyphaga | Staphylinidae | <i>Amischa analis</i>             | 0   | 0  | 0 | 0  | 1   | 0   | 1 | 0 | 2   |
| Coleoptera | Polyphaga | Staphylinidae | <i>Anotylus tetracarinatus</i>    | 1   | 0  | 0 | 0  | 0   | 0   | 0 | 0 | 1   |
| Coleoptera | Polyphaga | Staphylinidae | <i>Atheta aegra</i>               | 1   | 0  | 0 | 0  | 1   | 0   | 0 | 0 | 2   |
| Coleoptera | Polyphaga | Staphylinidae | <i>Atheta cauta</i>               | 1   | 0  | 0 | 0  | 0   | 0   | 0 | 0 | 1   |
| Coleoptera | Polyphaga | Staphylinidae | <i>Atheta crassicornis</i>        | 1   | 0  | 0 | 0  | 1   | 0   | 0 | 0 | 2   |
| Coleoptera | Polyphaga | Staphylinidae | <i>Atheta fungi</i>               | 1   | 0  | 0 | 0  | 5   | 0   | 0 | 0 | 6   |
| Coleoptera | Polyphaga | Staphylinidae | <i>Atheta incognita</i>           | 0   | 0  | 0 | 0  | 1   | 0   | 0 | 0 | 1   |
| Coleoptera | Polyphaga | Staphylinidae | <i>Atheta myrmecobia</i>          | 0   | 0  | 0 | 0  | 0   | 1   | 0 | 0 | 1   |
| Coleoptera | Polyphaga | Staphylinidae | <i>Atheta nigricornis</i>         | 2   | 0  | 2 | 0  | 3   | 0   | 0 | 0 | 7   |
| Coleoptera | Polyphaga | Staphylinidae | <i>Atheta palustris</i>           | 0   | 0  | 0 | 0  | 2   | 0   | 0 | 0 | 2   |
| Coleoptera | Polyphaga | Staphylinidae | <i>Atheta sodalis</i>             | 1   | 0  | 0 | 0  | 0   | 0   | 0 | 0 | 1   |
| Coleoptera | Polyphaga | Staphylinidae | <i>Atheta subtilis</i>            | 0   | 0  | 0 | 0  | 1   | 0   | 0 | 0 | 1   |
| Coleoptera | Polyphaga | Staphylinidae | <i>Atrecus affinis</i>            | 0   | 0  | 0 | 0  | 1   | 0   | 0 | 0 | 1   |
| Coleoptera | Polyphaga | Staphylinidae | <i>Bolitochara obliqua</i>        | 1   | 0  | 0 | 0  | 0   | 0   | 0 | 0 | 1   |
| Coleoptera | Polyphaga | Staphylinidae | <i>Coprophilus striatulus</i>     | 1   | 0  | 0 | 0  | 0   | 0   | 0 | 0 | 1   |
| Coleoptera | Polyphaga | Staphylinidae | <i>Enalodroma hepatica</i>        | 1   | 0  | 0 | 0  | 0   | 0   | 0 | 0 | 1   |
| Coleoptera | Polyphaga | Staphylinidae | <i>Euryusa castanoptera</i>       | 0   | 0  | 0 | 0  | 1   | 0   | 0 | 0 | 1   |
| Coleoptera | Polyphaga | Staphylinidae | <i>Eusphalerum abdominale</i>     | 1   | 0  | 1 | 0  | 0   | 0   | 0 | 0 | 2   |
| Coleoptera | Polyphaga | Staphylinidae | <i>Eusphalerum sorbi</i>          | 106 | 53 | 4 | 13 | 135 | 192 | 1 | 1 | 505 |
| Coleoptera | Polyphaga | Staphylinidae | <i>Gabrius coxalus</i>            | 0   | 0  | 0 | 0  | 1   | 0   | 0 | 0 | 1   |
| Coleoptera | Polyphaga | Staphylinidae | <i>Gabrius splendidulus</i>       | 0   | 0  | 0 | 0  | 1   | 0   | 0 | 0 | 1   |
| Coleoptera | Polyphaga | Staphylinidae | <i>Geostiba circellaris</i>       | 1   | 0  | 0 | 0  | 0   | 0   | 0 | 0 | 1   |
| Coleoptera | Polyphaga | Staphylinidae | <i>Habrocerus capillaricornis</i> | 0   | 0  | 0 | 0  | 1   | 0   | 0 | 0 | 1   |
| Coleoptera | Polyphaga | Staphylinidae | <i>Haploglossa villosula</i>      | 1   | 0  | 0 | 0  | 3   | 0   | 0 | 0 | 4   |
| Coleoptera | Polyphaga | Staphylinidae | <i>Heterothops dissimilis</i>     | 0   | 0  | 0 | 0  | 1   | 0   | 0 | 0 | 1   |
| Coleoptera | Polyphaga | Staphylinidae | <i>Holobus flavicornis</i>        | 0   | 0  | 0 | 0  | 0   | 0   | 1 | 0 | 1   |
| Coleoptera | Polyphaga | Staphylinidae | <i>Ischnoglossa spec.</i>         | 0   | 0  | 2 | 0  | 0   | 0   | 0 | 0 | 2   |

|            |           |               |                                   |   |   |   |   |   |   |   |   |   |
|------------|-----------|---------------|-----------------------------------|---|---|---|---|---|---|---|---|---|
| Coleoptera | Polyphaga | Staphylinidae | <i>Leptusa fumida</i>             | 0 | 0 | 1 | 0 | 0 | 0 | 0 | 0 | 1 |
| Coleoptera | Polyphaga | Staphylinidae | <i>Leptusa norvegica</i>          | 1 | 0 | 0 | 0 | 0 | 0 | 0 | 0 | 1 |
| Coleoptera | Polyphaga | Staphylinidae | <i>Leptusa pulchella</i>          | 1 | 0 | 0 | 0 | 1 | 0 | 0 | 0 | 2 |
| Coleoptera | Polyphaga | Staphylinidae | <i>Leptusa ruficollis</i>         | 1 | 0 | 0 | 0 | 0 | 0 | 0 | 0 | 1 |
| Coleoptera | Polyphaga | Staphylinidae | <i>Lesteva longoelytrata</i>      | 1 | 0 | 0 | 0 | 2 | 0 | 0 | 0 | 3 |
| Coleoptera | Polyphaga | Staphylinidae | <i>Mycetoporus lepidus</i>        | 0 | 0 | 0 | 0 | 0 | 0 | 1 | 0 | 1 |
| Coleoptera | Polyphaga | Staphylinidae | <i>Omalius caesum</i>             | 0 | 0 | 0 | 0 | 1 | 0 | 0 | 0 | 1 |
| Coleoptera | Polyphaga | Staphylinidae | <i>Omalius rivulare</i>           | 3 | 0 | 0 | 0 | 0 | 0 | 0 | 0 | 3 |
| Coleoptera | Polyphaga | Staphylinidae | <i>Oxypoda alternans</i>          | 1 | 0 | 0 | 0 | 0 | 0 | 0 | 0 | 1 |
| Coleoptera | Polyphaga | Staphylinidae | <i>Oxypoda opaca</i>              | 0 | 0 | 0 | 0 | 0 | 0 | 1 | 0 | 1 |
| Coleoptera | Polyphaga | Staphylinidae | <i>Philonthus albipes</i>         | 1 | 0 | 0 | 0 | 0 | 0 | 0 | 0 | 1 |
| Coleoptera | Polyphaga | Staphylinidae | <i>Philonthus cognatus</i>        | 0 | 0 | 0 | 0 | 1 | 0 | 0 | 0 | 1 |
| Coleoptera | Polyphaga | Staphylinidae | <i>Philonthus concinnus</i>       | 0 | 0 | 1 | 0 | 0 | 0 | 0 | 0 | 1 |
| Coleoptera | Polyphaga | Staphylinidae | <i>Phloeocharis subtilissima</i>  | 1 | 0 | 0 | 0 | 0 | 0 | 0 | 0 | 1 |
| Coleoptera | Polyphaga | Staphylinidae | <i>Phloeopora corticalis</i>      | 0 | 0 | 5 | 0 | 0 | 0 | 0 | 0 | 5 |
| Coleoptera | Polyphaga | Staphylinidae | <i>Phloeopora testacea</i>        | 0 | 0 | 0 | 0 | 1 | 0 | 0 | 0 | 1 |
| Coleoptera | Polyphaga | Staphylinidae | <i>Phyllodrepa ioptera</i>        | 1 | 0 | 0 | 0 | 0 | 0 | 0 | 0 | 1 |
| Coleoptera | Polyphaga | Staphylinidae | <i>Placusa tachyporoides</i>      | 0 | 0 | 0 | 0 | 3 | 0 | 0 | 0 | 3 |
| Coleoptera | Polyphaga | Staphylinidae | <i>Quedius maurus</i>             | 1 | 0 | 0 | 0 | 0 | 0 | 0 | 0 | 1 |
| Coleoptera | Polyphaga | Staphylinidae | <i>Quedius mesomelinus</i>        | 1 | 0 | 0 | 0 | 0 | 0 | 0 | 0 | 1 |
| Coleoptera | Polyphaga | Staphylinidae | <i>Quedius xanthopus</i>          | 0 | 1 | 0 | 0 | 5 | 0 | 0 | 0 | 6 |
| Coleoptera | Polyphaga | Staphylinidae | <i>Rugilus rufipes</i>            | 0 | 0 | 0 | 0 | 0 | 1 | 0 | 0 | 1 |
| Coleoptera | Polyphaga | Staphylinidae | <i>Scaphisoma agaricinum</i>      | 3 | 0 | 0 | 0 | 0 | 0 | 0 | 0 | 3 |
| Coleoptera | Polyphaga | Staphylinidae | <i>Scopaeus laevigatus</i>        | 0 | 0 | 0 | 0 | 0 | 0 | 1 | 0 | 1 |
| Coleoptera | Polyphaga | Staphylinidae | <i>Syntomium aeneum</i>           | 1 | 0 | 0 | 0 | 0 | 0 | 0 | 0 | 1 |
| Coleoptera | Polyphaga | Staphylinidae | <i>Tachinus elongatus</i>         | 1 | 0 | 0 | 0 | 0 | 0 | 0 | 0 | 1 |
| Coleoptera | Polyphaga | Staphylinidae | <i>Tachinus signatus</i>          | 1 | 0 | 0 | 0 | 0 | 0 | 0 | 0 | 1 |
| Coleoptera | Polyphaga | Tenebrionidae | <i>Bolitophagus reticulatus</i>   | 2 | 0 | 0 | 0 | 1 | 0 | 0 | 0 | 3 |
| Coleoptera | Polyphaga | Tenebrionidae | <i>Stenomax aeneus</i>            | 0 | 0 | 1 | 0 | 3 | 0 | 0 | 0 | 4 |
| Coleoptera | Polyphaga | Throscidae    | <i>Aulonothroscus brevicollis</i> | 1 | 0 | 0 | 0 | 3 | 1 | 0 | 1 | 6 |

|            |             |                  |                                            |   |   |   |   |    |    |    |   |     |
|------------|-------------|------------------|--------------------------------------------|---|---|---|---|----|----|----|---|-----|
| Coleoptera | Polyphaga   | Throscidae       | <i>Trixagus dermestoides</i>               | 2 | 2 | 1 | 0 | 96 | 43 | 6  | 2 | 152 |
| Coleoptera | Polyphaga   | Throscidae       | <i>Trixagus leseigneuri</i>                | 0 | 0 | 0 | 0 | 7  | 2  | 0  | 0 | 9   |
| Coleoptera | Polyphaga   | Throscidae       | <i>Trixagus meybohmi</i>                   | 0 | 0 | 0 | 0 | 1  | 4  | 0  | 0 | 5   |
| Coleoptera | Polyphaga   | Trogidae         | <i>Trox scaber</i>                         | 0 | 0 | 1 | 0 | 0  | 0  | 0  | 0 | 1   |
| Coleoptera | Polyphaga   | Trogositidae     | <i>Nemosoma elongatum</i>                  | 0 | 0 | 2 | 1 | 5  | 0  | 1  | 0 | 9   |
| Hemiptera  | Heteroptera | Acanthosomatidae | <i>Acanthosoma haemorrhoidale</i>          | 0 | 0 | 1 | 0 | 0  | 0  | 0  | 0 | 1   |
| Hemiptera  | Heteroptera | Anthocoridae     | <i>Anthocoris confusus</i>                 | 1 | 0 | 1 | 1 | 0  | 0  | 0  | 0 | 3   |
| Hemiptera  | Heteroptera | Anthocoridae     | <i>Orius majusculus</i>                    | 0 | 0 | 1 | 0 | 0  | 0  | 0  | 0 | 1   |
| Hemiptera  | Heteroptera | Anthocoridae     | <i>Orius minutus</i>                       | 0 | 0 | 1 | 0 | 0  | 1  | 0  | 0 | 2   |
| Hemiptera  | Heteroptera | Anthocoridae     | <i>Temnostethus pusillus</i>               | 0 | 0 | 1 | 0 | 0  | 0  | 0  | 0 | 1   |
| Hemiptera  | Heteroptera | Aradidae         | <i>Aradus depressus</i>                    | 1 | 0 | 0 | 0 | 0  | 0  | 0  | 0 | 1   |
| Hemiptera  | Heteroptera | Lygaeidae        | <i>Drymus ryeei</i>                        | 0 | 0 | 0 | 0 | 1  | 0  | 0  | 0 | 1   |
| Hemiptera  | Heteroptera | Lygaeidae        | <i>Gastrodes abietum</i>                   | 0 | 0 | 0 | 0 | 2  | 1  | 2  | 0 | 5   |
| Hemiptera  | Heteroptera | Lygaeidae        | <i>Kleidocerys resedae</i>                 | 0 | 0 | 1 | 0 | 1  | 0  | 0  | 0 | 2   |
| Hemiptera  | Heteroptera | Lygaeidae        | <i>Trapezonotus dispar</i>                 | 0 | 0 | 0 | 0 | 1  | 0  | 0  | 0 | 1   |
| Hemiptera  | Heteroptera | Microphysidae    | <i>Loricula elegantula</i>                 | 0 | 0 | 2 | 0 | 2  | 0  | 1  | 1 | 6   |
| Hemiptera  | Heteroptera | Microphysidae    | <i>Loricula pselaphiformis</i>             | 5 | 0 | 1 | 0 | 0  | 0  | 0  | 0 | 6   |
| Hemiptera  | Heteroptera | Miridae          | <i>Actinonotus pulcher</i>                 | 0 | 0 | 0 | 0 | 2  | 0  | 0  | 0 | 2   |
| Hemiptera  | Heteroptera | Miridae          | <i>Atractotomus magnicornis</i>            | 0 | 0 | 0 | 0 | 5  | 0  | 12 | 0 | 17  |
| Hemiptera  | Heteroptera | Miridae          | <i>Blepharidopterus angulatus</i>          | 1 | 1 | 0 | 0 | 0  | 0  | 0  | 0 | 2   |
| Hemiptera  | Heteroptera | Miridae          | <i>Campyloneura virgula</i>                | 0 | 2 | 0 | 0 | 0  | 0  | 0  | 0 | 2   |
| Hemiptera  | Heteroptera | Miridae          | <i>Cremnocephalus alpestris</i>            | 0 | 0 | 0 | 0 | 0  | 0  | 7  | 0 | 7   |
| Hemiptera  | Heteroptera | Miridae          | <i>Deraeocoris lutescens</i>               | 0 | 0 | 1 | 0 | 0  | 0  | 0  | 0 | 1   |
| Hemiptera  | Heteroptera | Miridae          | <i>Dryophilocoris flavoquadrimaculatus</i> | 6 | 1 | 1 | 0 | 0  | 0  | 0  | 0 | 8   |
| Hemiptera  | Heteroptera | Miridae          | <i>Harpocera thoracica</i>                 | 0 | 0 | 0 | 0 | 1  | 0  | 4  | 0 | 5   |
| Hemiptera  | Heteroptera | Miridae          | <i>Monalocoris filicis</i>                 | 0 | 0 | 0 | 0 | 0  | 1  | 0  | 0 | 1   |
| Hemiptera  | Heteroptera | Miridae          | <i>Parapsallus vitellinus</i>              | 0 | 0 | 0 | 0 | 4  | 0  | 9  | 2 | 15  |
| Hemiptera  | Heteroptera | Miridae          | <i>Phylus melanocephalus</i>               | 1 | 0 | 0 | 0 | 0  | 0  | 0  | 0 | 1   |
| Hemiptera  | Heteroptera | Miridae          | <i>Phytocoris dimidiatus</i>               | 0 | 0 | 4 | 0 | 0  | 0  | 0  | 0 | 4   |
| Hemiptera  | Heteroptera | Miridae          | <i>Phytocoris longipennis</i>              | 0 | 0 | 0 | 0 | 0  | 4  | 0  | 1 | 5   |

|              |             |              |                                |             |            |            |           |             |            |            |           |             |
|--------------|-------------|--------------|--------------------------------|-------------|------------|------------|-----------|-------------|------------|------------|-----------|-------------|
| Hemiptera    | Heteroptera | Miridae      | <i>Psallus varians</i>         | 10          | 1          | 23         | 0         | 1           | 0          | 0          | 0         | 35          |
| Hemiptera    | Heteroptera | Miridae      | <i>Rhabdomiris striatellus</i> | 0           | 1          | 2          | 0         | 0           | 0          | 0          | 0         | 3           |
| Hemiptera    | Heteroptera | Nabidae      | <i>Himacerus apterus</i>       | 2           | 0          | 1          | 0         | 1           | 0          | 1          | 0         | 5           |
| Hemiptera    | Heteroptera | Pentatomidae | <i>Chlorochroa pinicola</i>    | 0           | 0          | 0          | 0         | 0           | 0          | 1          | 0         | 1           |
| Hemiptera    | Heteroptera | Pentatomidae | <i>Dolycoris baccarum</i>      | 0           | 0          | 1          | 0         | 0           | 0          | 0          | 0         | 1           |
| Hemiptera    | Heteroptera | Pentatomidae | <i>Palomena prasina</i>        | 0           | 0          | 0          | 0         | 1           | 0          | 0          | 0         | 1           |
| Hemiptera    | Heteroptera | Pentatomidae | <i>Pentatoma rufipes</i>       | 5           | 0          | 6          | 1         | 3           | 0          | 3          | 0         | 18          |
| <b>Total</b> |             |              |                                | <b>1241</b> | <b>116</b> | <b>629</b> | <b>88</b> | <b>2202</b> | <b>347</b> | <b>777</b> | <b>42</b> | <b>5442</b> |
