# Supplementary material for: Searching for the Optimal Sampling Solution: Variation in Invertebrate Communities, Sample Condition and DNA Quality
Source: PubMed Central journal article supplement (PMC4740435; doi:10.1371/journal.pone.0148247), 2016-02-03
Supplement: pone.0148247.s008.pdf [file pone.0148247.s008.pdf]

**Supplementary S8: Additional information on DNA barcoding**

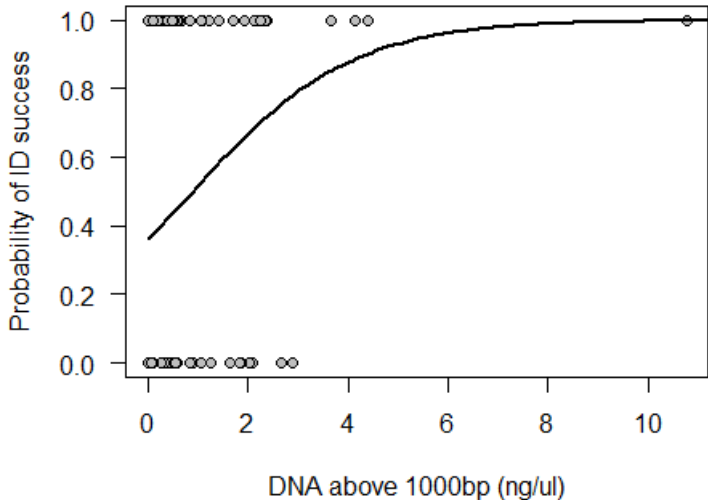

**Figure A:** The probability of successful ID of a sample as a function of the concentration of good DNA in the sample.

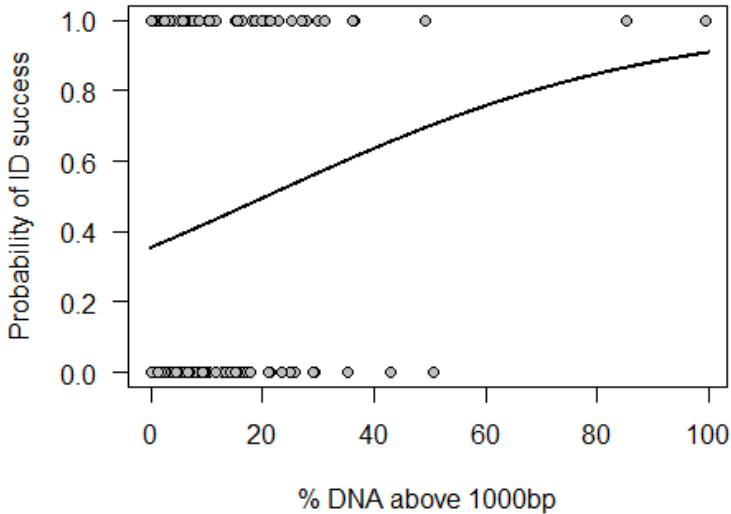

**Figure B:** The probability of successful ID of a sample as a function of the % of good DNA in the sample.
